# Supplementary material for: What is clinician presence? A qualitative interview study comparing physician and non-physician insights about practices of human connection
Source: PubMed Central journal article supplement — BMJ Open. 2019 Nov 3;9(11):e030831. doi: 10.1136/bmjopen-2019-030831 (PMC6858153; doi:10.1136/bmjopen-2019-030831), 2019-11-03
Supplement: bmjopen-2019-030831.draft_revisions.pdf [file bmjopen-2019-030831.draft_revisions.pdf]

# BMJ Open

BMJ Open is committed to open peer review. As part of this commitment we make the peer review history of every article we publish publicly available.

When an article is published we post the peer reviewers' comments and the authors' responses online. We also post the versions of the paper that were used during peer review. These are the versions that the peer review comments apply to.

The versions of the paper that follow are the versions that were submitted during the peer review process. They are not the versions of record or the final published versions. They should not be cited or distributed as the published version of this manuscript.

BMJ Open is an open access journal and the full, final, typeset and author-corrected version of record of the manuscript is available on our site with no access controls, subscription charges or pay-per-view fees (<http://bmjopen.bmj.com>).

If you have any questions on BMJ Open's open peer review process please email [info.bmjopen@bmj.com](mailto:info.bmjopen@bmj.com)

# BMJ Open

## Presence: Physician and non-physician insights about the art of human connection in clinical encounters

|                               |                                                                                                                                                                                                                                                                                                                                                                                                                                                              |
|-------------------------------|--------------------------------------------------------------------------------------------------------------------------------------------------------------------------------------------------------------------------------------------------------------------------------------------------------------------------------------------------------------------------------------------------------------------------------------------------------------|
| Journal:                      | <i>BMJ Open</i>                                                                                                                                                                                                                                                                                                                                                                                                                                              |
| Manuscript ID                 | bmjopen-2019-030831                                                                                                                                                                                                                                                                                                                                                                                                                                          |
| Article Type:                 | Research                                                                                                                                                                                                                                                                                                                                                                                                                                                     |
| Date Submitted by the Author: | 03-Apr-2019                                                                                                                                                                                                                                                                                                                                                                                                                                                  |
| Complete List of Authors:     | Brown-Johnson, Cati; Stanford University,<br>Schwartz, Rachel; Stanford University<br>Maitra, Amrapali; Stanford University<br>Haverfield, Marie; Stanford University<br>Tierney, Aaron; Stanford University<br>Shaw, Jonathan G; Stanford University<br>Zionts, Dani; Stanford University<br>Safaeinili, Nadia; Stanford University<br>Thadaney, Sonoo; Stanford University<br>Verghese, Abraham; Stanford University<br>Zulman, Donna; Stanford University |
| Keywords:                     | physician-patient relationships, QUALITATIVE RESEARCH, burnout, physician presence, PRIMARY CARE                                                                                                                                                                                                                                                                                                                                                             |
|                               |                                                                                                                                                                                                                                                                                                                                                                                                                                                              |

SCHOLARONE™  
Manuscripts

1  
2  
3  
4  
5 Presence: Physician and non-physician insights about the art of human connection in clinical  
6  
7 encounters  
8  
9

10  
11 Authors: Cati G. Brown-Johnson, PhD, Rachel Schwartz, PhD, Amrapali Maitra, MD, PhD,  
12  
13 Marie C. Haverfield, PhD, Aaron A. Tierney, Jonathan G. Shaw, MD, Dani L. Zions, MPH,  
14  
15 Nadia Safaeinili, MPH, Sonoo Thadaney, MBA, Abraham Verghese, MD, Donna M. Zulman,  
16  
17 MD  
18  
19  
20  
21  
22

23 Affiliations:

24  
25 C.G. Brown-Johnson is a social science research scholar, Division of Primary Care & Population  
26  
27 Health, Stanford University School of Medicine, Stanford, CA  
28  
29  
30

31  
32 R. Schwartz is a postdoctoral scholar, Center for Innovation to Implementation (Ci2i), VA Palo  
33  
34 Alto Health Care System, Menlo Park, CA  
35  
36  
37

38  
39 A. Maitra is a resident at Brigham and Women's Hospital, Harvard Medical School, Boston,  
40  
41 MA  
42  
43  
44

45  
46 M.C. Haverfield is a postdoctoral scholar, Center for Innovation to Implementation (Ci2i), VA  
47  
48 Palo Alto Health Care System, Menlo Park, CA  
49  
50  
51

52  
53 A.A. Tierney is research assistant, Division of Primary Care & Population Health, Stanford  
54  
55 University School of Medicine, Stanford, CA  
56  
57  
58

1  
2  
3  
4  
5 J.G. Shaw is assistant professor, Division of Primary Care & Population Health, Stanford  
6  
7  
8 University School of Medicine, Stanford, CA  
9

10  
11  
12 D.L. Zions is a social science research associate, Division of Primary Care & Population Health,  
13  
14  
15 Stanford University School of Medicine, Stanford, CA  
16

17  
18  
19 N. Safaeinili is a social science research associate, Division of Primary Care & Population  
20  
21  
22 Health, Stanford University School of Medicine, Stanford, CA  
23

24  
25  
26 S. Thadaney is executive director, Presence and the Society for Bedside Medicine, Stanford  
27  
28  
29 University School of Medicine, Stanford, CA  
30

31  
32  
33 A. Verghese is professor, Presence and the Society for Bedside Medicine, Stanford University  
34  
35  
36 School of Medicine, Stanford, CA  
37

38  
39  
40 D. Zulman is associate professor, Division of Primary Care & Population Health, Stanford  
41  
42  
43 University School of Medicine, Stanford, CA  
44

45  
46  
47 Correspondence should be addressed to:  
48

49  
50 Cati Brown-Johnson  
51

52  
53 Division of Primary Care and Population Health  
54

55  
56 Stanford University School of Medicine  
57

1  
2  
3 Stanford MSOB, 1265 Welch Rd x216  
4

5  
6 Palo Alto, CA 94305  
7

8  
9 Telephone: (650) 736-3394  
10

11  
12 Email: [catibj@stanford.edu](mailto:catibj@stanford.edu)  
13

14  
15  
16 Please note:  
17

18  
19  
20  
21 Word count: 1246  
22

23  
24  
25 Numbers of tables: 2  
26

27  
28  
29 Keywords: Physician-patient relationships, qualitative research, burnout, physician presence,  
30  
31 primary health care  
32  
33  
34  
35  
36  
37  
38  
39  
40  
41  
42  
43  
44  
45  
46  
47  
48  
49  
50  
51  
52  
53  
54  
55  
56  
57  
58  
59  
60

## Abstract

Objective: We sought to investigate the concept and practices of “clinician presence” through interviews to explore how physicians and professionals create connection, engage in interpersonal interaction, and build trust with individuals across different circumstances and contexts.

Design: In 2017, we conducted semi-structured interviews with primary care physicians and non-medical professionals (n=40) representing diverse fields including protective services, business, management, education, art/design/entertainment, and social services.

Setting: Physicians were recruited from community safety-net, academic medical center, and Veterans Affairs systems.

Participants: Participants were balanced in terms of gender (55% male, 45% female), and represented a diversity of race/ethnicities while skewing white/caucasian (60%).

Results: Qualitative analyses yielded a definition of presence as *a purposeful practice of awareness, focus, and attention with the intent to understand and connect with individuals/patients*. For both medical and non-medical professionals, creating presence requires managing and considering time and environmental factors; for physicians in particular, this includes managing and integrating technology. Listening was described as central to creating the state of being present. Within a clinic, presence might manifest as a physician listening without interrupting, focusing intentionally on the patient, taking brief re-centering breaks throughout a

1  
2  
3 clinic day; and informing patients when attention must be redirected to administrative or  
4  
5 technology demands.  
6  
7  
8  
9

10 Conclusions: Clinician presence involves learning to step back, pause, and be prepared to receive  
11 a patient's story. Building on strategies from physicians and non-medical professionals, clinician  
12 presence is best enacted through purposeful intention to connect, conscious navigation of time,  
13 and proactive management of technology and the environment in order to focus attention on the  
14 patient. Everyday practice or ritual supporting these strategies could support physician self-care  
15 as well as physician-patient connection.  
16  
17  
18  
19  
20  
21  
22  
23  
24  
25

### 26 **Strengths and limitations of this study**

27  
28  
29

- 30 • This study the first in our knowledge to directly address defining physician *presence*.
- 31 • A strength of this study is the novel incorporation of design principle methods. We  
32 examined the analogous context of other non-medical caring professions to better  
33 understand our object of interest, physician presence.  
34  
35
- 36 • Our dataset is modest for a quantitative study (n=40), but acceptable for a qualitative  
37 investigation. We did find thematic saturation and coherence with our 40 participants.  
38  
39  
40  
41  
42  
43  
44  
45  
46  
47  
48  
49  
50  
51  
52  
53  
54  
55  
56  
57  
58  
59  
60

## Introduction

The practice of medicine today is challenging because of data-entry requirements, rapid patient turnover, and inadequate reimbursement. The demands of practicing medicine present many barriers to physicians' ability to deliver humanistic care and uphold the ideals of medicine. Patient experience suffers, and meanwhile the rates of physician burnout have reached alarming levels.<sup>1</sup> Interventions that facilitate clinician mindfulness and engagement, and allow physicians to be more "present" might make space for physicians to reconnect with the personal rewards of clinical practice, even if little else changes. The concept of "presence" incorporates practice-oriented insights from across clinical care and research—including provider burnout,<sup>1</sup> patient-physician communication,<sup>2</sup> and patient-centered care<sup>3</sup>—and diverse other fields, ranging from business to education. Although the term is commonly used, we sought to identify a universal definition for presence through interviews with primary care physicians and non-medical professionals from diverse fields in which human connection is central.

## Methods

We conducted semi-structured interviews in 2017-18 with 40 medical and non-medical professionals in California. Team members trained in qualitative methods (CBJ, RS, DZ, and NS) interviewed 10 primary care and family physicians from 3 primary care clinics in an academic medical center, a Veterans Affairs facility, and a community safety-net clinic.



1  
2  
3 Following a human-centered design approach (ie. analogous inspiration),<sup>4</sup> we used convenience  
4 sampling to interview 30 individuals representing a variety of non-medical professions from 11  
5  
6 of the 25 occupation groups listed by the US Bureau of Labor Statistics (Table 1). We  
7  
8 intentionally targeted professionals whose work involves fostering effective connections with  
9  
10 individuals, often under stressful circumstances, and excluded professions in other areas.  
11  
12

13  
14 Overall, participants were balanced in terms of gender (55% male, 45% female), and represented  
15  
16 a diversity of race/ethnicities while skewing white/Caucasian (60%) (Table 2). Ethical approval  
17  
18 was granted for this study by the Stanford IRB, protocol 42397; October 26, 2017.  
19  
20  
21

22  
23 Interviews explored the concept of “presence” with questions about creating connection, being  
24  
25 more present, building trust, adjusting strategies for different people, and navigating the  
26  
27 environment during interactions with clients and patients. All interviews were recorded and  
28  
29 transcribed, and we used the constant comparative method to code transcripts, meeting  
30  
31 frequently as a team to discuss and workshop qualitative themes.<sup>5</sup> Interview excerpts relevant to  
32  
33 presence were independently analyzed by two qualitative researchers (AM – PhD in  
34  
35 Anthropology; CBJ – PhD in Linguistics) to generate core elements of presence. These elements  
36  
37 were iteratively refined into a framework and working definition of presence through team  
38  
39 discussions and research meetings. This resulted in: 1) a shared definition of presence; 2) a  
40  
41 framework with several major themes supporting this definition; and 3) identification of cross-  
42  
43 professional strategies for attaining presence.  
44  
45  
46  
47  
48  
49  
50

51 Patient and Public Involvement  
52  
53  
54  
55  
56  
57  
58  
59  
60

1  
2  
3 Limited public involvement in the design and analysis of this research was elicited via research-  
4 in-progress presentations to the Presence Center at Stanford University School of Medicine.  
5  
6 Including non-medical participants in our study effectively obtains a public perspective on the  
7  
8 definition of clinician presence. Patient input was not directly requested.  
9  
10  
11  
12  
13

## 14 **Results**

15  
16  
17  
18  
19 Qualitative analyses yielded a definition for presence as, *a purposeful practice of awareness,*  
20 *focus, and attention with the intent to understand and connect with individuals/patients.* Our  
21  
22 framework focused on activities involved in creating presence: intentional connection, being  
23  
24 aware of time, and managing the physical environment (Table 3).  
25  
26  
27  
28  
29

### 30 **Presence requires purposeful intention to connect.**

31  
32  
33  
34  
35 Several interviewees noted that connection is created through “attention,” “focus,” and “listening  
36  
37 just to understand.” One physician described presence as “intense connected moment[s]” during  
38  
39 the clinical interview, where “[you are] trying to understand [a patient’s] level of suffering [and]  
40  
41 the significance of their story.” An EPA enforcement agent stated that connection is “the goal of  
42  
43 presence”; a chaplain defined presence as a state of “[not being] alone to each other.” Presence  
44  
45 was also described as the absence or opposite of distraction. A journalist reflected that not  
46  
47 paying attention could indicate “this person is not really interested...in me.”  
48  
49  
50  
51

52  
53 Interviewees described removing distractions and being prepared as key strategies to achieving  
54  
55 purposeful intention. Some mentioned removing both literal and figurative distractions. A  
56  
57  
58  
59  
60

1  
2  
3 restorative justice lawyer described a personal ritual of brushing off external or intruding  
4 thoughts and feelings between encounters to be more present, and repeating: “Now. Here. This.”  
5  
6 Several physicians described the value of arriving early to review charts and plan, in order to  
7  
8 enter into visits feeling prepared.  
9  
10  
11  
12  
13

#### 14 **Presence requires conscious navigation of time.**

15  
16  
17  
18 Presence was described as something temporal and tangible, happening during a specific time,  
19 and requiring protective boundaries. Time was referenced repeatedly, e.g. “taking a minute to  
20 notice” (health promoter). Echoing its root in the word “present,” presence was defined as not  
21 thinking ahead but instead returning to the present and being aware “in real time.”  
22  
23  
24  
25  
26  
27  
28  
29

30 Strategies related to presence and time included prioritizing brief quiet time for reflective “re-  
31 centering” breaks that physicians and professionals mentioned needing between patients/clients.  
32  
33 A physician also suggested “not filling every moment” of the day with technological distractions  
34 to allow more time for presence.  
35  
36  
37  
38  
39  
40

#### 41 **Presence requires awareness of the physical environment.**

42  
43  
44  
45 Presence was described in terms of its physical qualities. This included concrete factors such as  
46 positioning and spacing (“being physically there”), and also more abstract physical sensations  
47 e.g., “you feel it when the temperature changes in the room”. All interviewees described the pull  
48 of competing priorities, with physicians particularly highlighting the challenge that  
49 administrative-demands and the electronic medical record pose for presence, particularly because  
50  
51  
52  
53  
54  
55  
56  
57  
58  
59  
60

1  
2  
3 some providers express that it is “rude for somebody to look at a screen and not look at the  
4  
5 person in front of them.” Participants (physician, recreational therapist, design researcher, health  
6  
7 promotor) often equated presence with space, as in “holding space,” or “letting enough space in.”  
8  
9

10  
11  
12 Strategies related to presence and space emphasized that, as with other physical spaces, presence  
13  
14 requires boundaries. Participants created presence by determining who would be in the room and  
15  
16 setting boundaries for how much personal information to share. To combat the distancing effects  
17  
18 of technology, physicians described putting away phones during clinic visits and avoiding email.  
19  
20 In addition, some physicians discussed strategies that preserved connection with patients during  
21  
22 technology use: “presence is also letting them know... [you’re] looking something up [in the  
23  
24 medical record].”  
25  
26  
27  
28  
29

## 30 **Discussion**

31  
32  
33  
34

35 In this study of physicians and non-medical professionals whose jobs involve human connection,  
36  
37 we found that presence is a universal concept that involves intentionality, focus, and attention to  
38  
39 time and the physical environment.  
40  
41  
42  
43

44 A growing body of work has explored presence in the context of healthcare system/intervention  
45  
46 design,<sup>6-9</sup> and has focused on clinical conditions, actions or training to make presence possible.  
47  
48 To our knowledge, however, this is the first study to systematically generate a definition for  
49  
50 presence, which may help guide research and interventions that leverage insights from within  
51  
52 and outside the field of medicine.  
53  
54  
55  
56  
57  
58  
59  
60

1  
2  
3 The features of presence lend themselves to avenues for further exploration. Presence involves  
4 learning to step back, pause, suspend expectations, and receive and connect with someone's  
5 story. Listening was described as central to creating a state of focused attention. Physicians  
6 interrupt their patients early and often<sup>10</sup>-- an emphasis on listening as a prerequisite for presence  
7 opens conceptual and curricular space for teaching not only how to communicate, but when to  
8 stay silent. Presence lies at the juncture of interactions within clinical spaces; like many  
9 respondents describe, it hangs in the air, is felt as a physical quality, or emanates between two  
10 people whose goals are aligned.  
11  
12  
13  
14  
15  
16  
17  
18  
19  
20  
21  
22

23 Similarly, because presence is influenced by environmental factors for many professionals,  
24 teaching physicians to think about context (intention, time, physical environment, and routine)  
25 may help preserve and channel connections. Presence may be enhanced through strategies that  
26 facilitate focused attention on the patient (e.g., decreasing the intrusiveness of the electronic  
27 medical record, providing time for emotional/focus recovery between clinical encounters, and  
28 encouraging self-care to protect both physical and emotional boundaries).  
29  
30  
31  
32  
33  
34  
35  
36  
37  
38

39 This study the first in our knowledge to directly address defining physician *presence*. We also  
40 find that our study is strengthened by incorporating non-physician perspectives, following the  
41 design principle of examining analogous contexts – here other caring professions – to better  
42 understand our object of interest, physician presence. We are limited by a modest dataset, but did  
43 find thematic saturation and coherence with our 40 participants. Furthermore, another study  
44 could have performed a full review of presence in other domains, but we chose to focus just on  
45 presence with clients/patients to keep our research focused and targeted.  
46  
47  
48  
49  
50  
51  
52  
53  
54  
55  
56  
57  
58  
59  
60

1  
2  
3 Human connection is central to clinical care. While challenging to cultivate, this connection  
4 offers some of the greatest rewards to practicing physicians. Intentional practices that foster  
5 presence may make physicians more receptive to patient stories and facilitate meaningful  
6 exchanges that are critical to accurate diagnosis, clinical decision-making, and therapeutic  
7 interactions for both patients and physicians.  
8  
9  
10  
11  
12  
13  
14  
15  
16  
17  
18  
19  
20  
21  
22  
23  
24  
25  
26  
27  
28  
29  
30  
31  
32  
33  
34  
35  
36  
37  
38  
39  
40  
41  
42  
43  
44  
45  
46  
47  
48  
49  
50  
51  
52  
53  
54  
55  
56  
57  
58  
59  
60

1  
2  
3 Acknowledgments: None  
4  
5

6 Funding/Support: This study was supported by a grant from the Gordon and Betty Moore  
7 Foundation (#6382). RS and MCH were supported by a VA Office of Academic Affairs  
8 Advanced Fellowship in Health Services Research. The views expressed herein are those of the  
9 authors and do not necessarily reflect the views of the Department of Veterans Affairs.  
10  
11  
12  
13  
14  
15

16  
17  
18 Other disclosures: None.  
19  
20

21  
22 Ethical approval: Ethical approval has been granted for this study by the Stanford IRB, protocol  
23 42397; October 26, 2017.  
24  
25  
26

27  
28  
29 Disclaimer: None.  
30  
31

32  
33 Previous presentations: None.  
34  
35

36  
37 Authors' contributions  
38  
39

40  
41 CBJ was involved in data collection and analysis. She also was the primary author of the  
42 manuscript.  
43  
44  
45

46  
47  
48 RS was involved in data collection and analysis. She also was a major contributor to writing the  
49 manuscript.  
50  
51  
52

1  
2  
3 AM was involved in data collection and analysis. She also was primary contributor to the  
4  
5 manuscript.  
6  
7

8  
9  
10 MCH was involved in data collection and analysis. She also contributed significant edits to the  
11  
12 manuscript.  
13  
14

15  
16 AT was involved in data collection and analysis. He also contributed significant edits to the  
17  
18 manuscript.  
19  
20

21  
22  
23 JGS was involved in research design and also contributed significant edits to the manuscript.  
24  
25

26  
27 DZ was involved in data collection and analysis. She also contributed significant edits to the  
28  
29 manuscript.  
30  
31

32  
33  
34 NS was involved in data collection and analysis. She also contributed significant edits to the  
35  
36 manuscript.  
37  
38

39  
40 ST was involved in research design and also contributed significant edits to the manuscript.  
41  
42

43  
44  
45 AV was involved in research design and also contributed significant edits to the manuscript.  
46  
47

48  
49 DZ was involved in research design and data collection, and also contributed significant edits to  
50  
51 the manuscript.  
52  
53

54  
55  
56 All authors read and approved the final manuscript.  
57  
58



1  
2  
3  
4  
5  
6  
7  
8  
9  
10  
11  
12  
13  
14  
15  
16  
17  
18  
19  
20  
21  
22  
23  
24  
25  
26  
27  
28  
29  
30  
31  
32  
33  
34  
35  
36  
37  
38  
39  
40  
41  
42  
43  
44  
45  
46  
47  
48  
49  
50  
51  
52  
53  
54  
55  
56  
57  
58  
59  
60

Acknowledgements – N/A

For peer review only

## References

1. Shanafelt TD, Boone S, Tan L, et al. Burnout and Satisfaction With Work-Life Balance Among US Physicians Relative to the General US Population. *Arch Intern Med*. 2012;172(18):1377. doi:10.1001/archinternmed.2012.3199.
2. Boissy A, Windover AK, Bokar D, et al. Communication Skills Training for Physicians Improves Patient Satisfaction. *J Gen Intern Med*. 2016. doi:10.1007/s11606-016-3597-2.
3. Weissmann PF, Branch WT, Gracey CF, Haidet P, Frankel RM. Role modeling humanistic behavior: Learning bedside manner from the experts. *Acad Med*. 2006. doi:10.1097/01.ACM.0000232423.81299.fe.
4. <http://www.designkit.org/methods>
5. Glaser BG. The Constant Comparative Method of Qualitative Analysis. *Soc Probl*. 1965;12(4):436-445. doi:10.2307/798843.
6. Frankel R, Altschuler A, George S, et al. Effects of exam-room computing on clinician-patient communication: A longitudinal qualitative study. *J Gen Intern Med*. 2005. doi:10.1111/j.1525-1497.2005.0163.x.
7. Sabo BM. Compassionate presence: The meaning of hematopoietic stem cell transplant nursing. *Eur J Oncol Nurs*. 2011;15(2):103-111. doi:10.1016/J.EJON.2010.06.006.

- 1  
2  
3 8. Beer JM, Takayama L. Mobile remote presence systems for older adults. In: *Proceedings*  
4 *of the 6th International Conference on Human-Robot Interaction - HRI '11*. New York,  
5 New York, USA: ACM Press; 2011:19. doi:10.1145/1957656.1957665.  
6  
7  
8  
9  
10  
11  
12 9. Lee BM, Curlin FA, Choi PJ. Documenting presence: A descriptive study of chaplain  
13 notes in the intensive care unit. *Palliat Support Care*. 2017;15(02):190-196.  
14 doi:10.1017/S1478951516000407.  
15  
16  
17  
18  
19  
20  
21 10. Marvel MK, Epstein RM, Flowers K, Beckman HB. Soliciting the patient's agenda: have  
22 we improved? *JAMA*. 1999;281(3):283-287.  
23  
24  
25  
26 <http://www.ncbi.nlm.nih.gov/pubmed/9918487>. Accessed July 17, 2018.  
27  
28  
29  
30  
31  
32  
33  
34  
35  
36  
37  
38  
39  
40  
41  
42  
43  
44  
45  
46  
47  
48  
49  
50  
51  
52  
53  
54  
55  
56  
57  
58  
59  
60

**Table 1. Professionals Fields from the Bureau of Labor Statistics and Occupations of Non-Medical Interviewees**

| <b>Professional field/Occupation groups</b>                   | <b>Occupations</b>                     |
|---------------------------------------------------------------|----------------------------------------|
| Management                                                    | Hospice program director               |
|                                                               | Restaurateur                           |
|                                                               | Middle school principal                |
|                                                               | CEO of a technology company            |
|                                                               | Software company director              |
| Business & Financial/ Sales                                   | Television sales and marketing         |
|                                                               | Startup sales                          |
|                                                               | Specialty beverage importer            |
|                                                               | Realtor                                |
| Community & Social Service                                    | Chaplain                               |
|                                                               | Licensed clinical social worker (LCSW) |
|                                                               | Health promoter                        |
|                                                               | Teacher                                |
| Education, Training & Library                                 | Music instructor                       |
|                                                               | High school health educator            |
|                                                               | Psychology Professor                   |
|                                                               | Special education educator             |
| Arts & Design/ Entertainment & Sports/ Media & Communications | Documentary filmmaker                  |

1  
2  
3  
4  
5  
6  
7  
8  
9  
10  
11  
12  
13  
14  
15  
16  
17  
18  
19  
20  
21  
22  
23  
24  
25  
26  
27  
28  
29  
30  
31  
32  
33  
34  
35  
36  
37  
38  
39  
40  
41  
42  
43  
44  
45  
46  
47  
48  
49  
50  
51  
52  
53  
54  
55  
56  
57  
58  
59  
60

|                            |                            |
|----------------------------|----------------------------|
|                            | Design researcher          |
|                            | Professional musician      |
|                            | Creative designer          |
|                            | Journalist                 |
| Legal / Protective Service | Firefighter/EMT (Chief)    |
|                            | Restorative justice lawyer |
|                            | Police officer             |
|                            | EPA enforcement agent      |
| Personal Care and Service  | Yoga instructor            |
|                            | Hospice volunteer          |
|                            | Recreational therapist     |
|                            | Massage therapist          |

For peer review only

**Table 2. Characteristics of participants**

| <b>Characteristic</b>     | <b>n</b> | <b>Percentage of sample</b> |
|---------------------------|----------|-----------------------------|
| <b>Gender</b>             |          |                             |
| Male                      | 22       | 55%                         |
| Female                    | 18       | 45%                         |
| <b>Race/Ethnicity</b>     |          |                             |
| White/Caucasian           | 24       | 60%                         |
| Asian and southeast asian | 9        | 22.5%                       |
| Latino/a                  | 3        | 7.5%                        |
| Middle Eastern            | 2        | 5%                          |
| Pacific Islander          | 1        | 2.5%                        |
| African American          | 1        | 2.5%                        |
| <b>Age (years)</b>        |          |                             |
| 20-29                     | 4        | 10%                         |
| 30-39                     | 13       | 32.5%                       |
| 40-49                     | 10       | 25%                         |
| 50-59                     | 13       | 32.5%                       |

**Table 3. Comparative exemplar quotes from a national convenience sample of physicians and non-medical professionals about themes related to presence (n=40, interviews conducted in 2017-18)**

| Theme                                  | Physicians                                                                                                                                                                                                                                                                                      | Non-Medical Professionals                                                                                                                                                                                                                      |
|----------------------------------------|-------------------------------------------------------------------------------------------------------------------------------------------------------------------------------------------------------------------------------------------------------------------------------------------------|------------------------------------------------------------------------------------------------------------------------------------------------------------------------------------------------------------------------------------------------|
| <i>Purposeful Intention to Connect</i> |                                                                                                                                                                                                                                                                                                 |                                                                                                                                                                                                                                                |
| Intention to connect                   | You want to open [communication]... You want to have people feel freedom that they can talk to you about personal things. [MD1]                                                                                                                                                                 | I think that's the goal of presence... to obtain a connection, but you may or may not get it. [EPA enforcement agent]                                                                                                                          |
| Attention                              | I think just really being there, and being already listening to them, ...So, I don't look at the computer. I just really try to look at them. [MD1]                                                                                                                                             | I like attending better than presence because it suggests that there's a relationship. [LCSW]                                                                                                                                                  |
| Focus                                  | I guess it's just a complete focus on the patient at that time and at that moment, and really trying to give your undivided attention to that. [MD3]                                                                                                                                            | Staying focused on the moment, looking somebody in the eye, listening and responding to them. [Journalist]                                                                                                                                     |
| Listening                              | I think I've learned to just sit and listen and be present for when patients share their story about what's going on with them, and what's of interest to them, and really just giving them the space to talk about that and overcoming the urge to interrupt or direct the conversation. [MD8] | Staying focused on the moment, looking somebody in the eye, listening and responding to them. ...one of the most difficult parts of interviewing somebody is truly listening... So, being present is truly listening. [Journalist]             |
| Focusing on the client/patient story   | The interview often with me is... that really intense connected moment where I'm really trying to understand their level of suffering, what this means to them, the significance of their story and how that impacts their life. [MD2]                                                          | Most of the times it's about hearing someone's story and about why they did something, and where it led them, and who they are now. And so those experiences change me often ...because I was present for [the story]. [Documentary filmmaker] |
| Not being alone                        | ...so [a patient] didn't feel like she was completely alone in that, I assessed that the best way to make her feel safe was for me to disclose my vulnerability as well. [MD2]                                                                                                                  | We haven't been alone to each other, we haven't been alone to what's greater than ourselves. [Chaplain]                                                                                                                                        |

1  
2  
3  
4  
5  
6  
7  
8  
9

|                       |                                                                                                                                           |                                                                                                                                                                                                  |
|-----------------------|-------------------------------------------------------------------------------------------------------------------------------------------|--------------------------------------------------------------------------------------------------------------------------------------------------------------------------------------------------|
| Removing distractions | Well, so I kind of say that your baggage is packed. So it isn't spilling into the office visit or the phone call or whatever it is. [MD7] | It means kind of the opposite of distraction. It's kind of focus on your conversation and interaction with a person in real time and having a true sense of focus on it. [EPA enforcement agent] |
|-----------------------|-------------------------------------------------------------------------------------------------------------------------------------------|--------------------------------------------------------------------------------------------------------------------------------------------------------------------------------------------------|

---

10  
11 *Conscious Navigation of Time*

---

12  
13  
14  
15  
16  
17  
18  
19  
20

|                          |                                                                                                                                                                |                                                                                                                                                                                                                                          |
|--------------------------|----------------------------------------------------------------------------------------------------------------------------------------------------------------|------------------------------------------------------------------------------------------------------------------------------------------------------------------------------------------------------------------------------------------|
| Returning to the present | It is almost like a meditation where we're taught to focus on our breathing and focus, but naturally our mind wanders, and you want to check that email. [MD3] | ... the executive director of our organization who's a Jesuit priest, he always uses this mantra where he says, "Now. Here. This," to stay present. And so when I remember to do that, it has been helpful. [Restorative justice lawyer] |
|--------------------------|----------------------------------------------------------------------------------------------------------------------------------------------------------------|------------------------------------------------------------------------------------------------------------------------------------------------------------------------------------------------------------------------------------------|

21  
22  
23  
24  
25  
26  
27  
28  
29

|               |                                                                                                                                                                                                       |                                                                                                                                                                                                                                   |
|---------------|-------------------------------------------------------------------------------------------------------------------------------------------------------------------------------------------------------|-----------------------------------------------------------------------------------------------------------------------------------------------------------------------------------------------------------------------------------|
| Taking breaks | I take breaks, actually. I think that's been a big thing. I am no longer interested and I'm no longer capable, because of that, of this way of working where you're constantly doing something. [MD5] | Yeah, get a good sleep, making sure that [I've] eaten, making sure there's breaks, and that I have stuff with me to keep my energy going, like [chocolate] and water and stuff, whatever I need that day. [Documentary filmmaker] |
|---------------|-------------------------------------------------------------------------------------------------------------------------------------------------------------------------------------------------------|-----------------------------------------------------------------------------------------------------------------------------------------------------------------------------------------------------------------------------------|

30  
31  
32  
33  
34  
35  
36  
37

|                                        |                                                                                                                                                                                                                                                            |                                                                                                                                                                          |
|----------------------------------------|------------------------------------------------------------------------------------------------------------------------------------------------------------------------------------------------------------------------------------------------------------|--------------------------------------------------------------------------------------------------------------------------------------------------------------------------|
| Quiet/<br>silence /<br>slowing<br>down | I'm not in as much of a rush to get to the right answer. I'm more comfortable with the silence, with the space, with the level of certainty that comes with primary care, and understanding that I don't have to have the answer right this instant. [MD8] | I think silence is a big part of presence, and I think just taking a minute to notice, to get where the person is from, really how are you today. [Psychology professor] |
|----------------------------------------|------------------------------------------------------------------------------------------------------------------------------------------------------------------------------------------------------------------------------------------------------------|--------------------------------------------------------------------------------------------------------------------------------------------------------------------------|

---

38  
39 *Management of the Physical Environment*

---

40  
41  
42  
43  
44  
45  
46

|                                              |                                                                                                                                                                                                     |                                                                                                                                                                                         |
|----------------------------------------------|-----------------------------------------------------------------------------------------------------------------------------------------------------------------------------------------------------|-----------------------------------------------------------------------------------------------------------------------------------------------------------------------------------------|
| Occupying the same space as a client/patient | I certainly pull the chair up close to talk to people trying to find that right distance, not too close, but certainly not across the room. Just trying to be in that space with the patient. [MD1] | Presence is a felt sense that I have of ... being seated inside myself in my body and being present in the room, sitting in the room and aware of everything that's in the room. [LCSW] |
|----------------------------------------------|-----------------------------------------------------------------------------------------------------------------------------------------------------------------------------------------------------|-----------------------------------------------------------------------------------------------------------------------------------------------------------------------------------------|

47  
48  
49  
50  
51  
52  
53  
54  
55  
56

|                    |                                                                                                                                                                                                                                                                                               |                                                                                                                                                                                      |
|--------------------|-----------------------------------------------------------------------------------------------------------------------------------------------------------------------------------------------------------------------------------------------------------------------------------------------|--------------------------------------------------------------------------------------------------------------------------------------------------------------------------------------|
| Setting boundaries | I'll be very persistent [about staying on topic]. Like, 'Uh, no, we're not going there. We're staying here.' That's ...related to boundary setting ...trying to control things so that there can be connection, so that something can happen, so that there's time to actually engage...[MD5] | ...Setting boundaries... [is] I hear you say ... 'heres what I'm going to do and here's what you're going to do. Is that okay with you?' Asking permission. [Recreational therapist] |
|--------------------|-----------------------------------------------------------------------------------------------------------------------------------------------------------------------------------------------------------------------------------------------------------------------------------------------|--------------------------------------------------------------------------------------------------------------------------------------------------------------------------------------|

---



1  
2  
3  
4 Technology/  
5 managing  
6 competing  
7 priorities  
8

---

And so, maybe part of presence is also letting them know, okay, I'm looking at the ER visit, because you're telling me about that. [MD3]

So you close the laptop and you get away from the table and you don't look at your notes and you connect.  
[Psychology professor]

9  
10  
11  
12  
13  
14  
15  
16  
17  
18  
19  
20  
21  
22  
23  
24  
25  
26  
27  
28  
29  
30  
31  
32  
33  
34  
35  
36  
37  
38  
39  
40  
41  
42  
43  
44  
45  
46  
47  
48  
49  
50  
51  
52  
53  
54  
55  
56  
57  
58  
59  
60

For peer review only

# Reporting checklist for qualitative study.

Based on the SRQR guidelines.

## Instructions to authors

Complete this checklist by entering the page numbers from your manuscript where readers will find each of the items listed below.

Your article may not currently address all the items on the checklist. Please modify your text to include the missing information. If you are certain that an item does not apply, please write "n/a" and provide a short explanation.

Upload your completed checklist as an extra file when you submit to a journal.

In your methods section, say that you used the SRQR reporting guidelines, and cite them as:

O'Brien BC, Harris IB, Beckman TJ, Reed DA, Cook DA. Standards for reporting qualitative research: a synthesis of recommendations. *Acad Med.* 2014;89(9):1245-1251.

|                                            | Reporting Item                                                                                                                                                                                                                                 | Page Number |
|--------------------------------------------|------------------------------------------------------------------------------------------------------------------------------------------------------------------------------------------------------------------------------------------------|-------------|
|                                            | #1 Concise description of the nature and topic of the study identifying the study as qualitative or indicating the approach (e.g. ethnography, grounded theory) or data collection methods (e.g. interview, focus group) is recommended        | 1           |
|                                            | #2 Summary of the key elements of the study using the abstract format of the intended publication; typically includes background, purpose, methods, results and conclusions                                                                    | 4-5         |
| Problem formulation                        | #3 Description and significance of the problem / phenomenon studied: review of relevant theory and empirical work; problem statement                                                                                                           | 6           |
| Purpose or research question               | #4 Purpose of the study and specific objectives or questions                                                                                                                                                                                   | 6           |
| Qualitative approach and research paradigm | #5 Qualitative approach (e.g. ethnography, grounded theory, case study, phenomenology, narrative research) and guiding theory if appropriate; identifying the research paradigm (e.g. postpositivist, constructivist / interpretivist) is also | 6-7         |

recommended; rationale. The rationale should briefly discuss the justification for choosing that theory, approach, method or technique rather than other options available; the assumptions and limitations implicit in those choices and how those choices influence study conclusions and transferability. As appropriate the rationale for several items might be discussed together.

|    |                            |     |                                                                    |   |
|----|----------------------------|-----|--------------------------------------------------------------------|---|
| 1  |                            |     |                                                                    |   |
| 2  |                            |     |                                                                    |   |
| 3  |                            |     |                                                                    |   |
| 4  |                            |     |                                                                    |   |
| 5  |                            |     |                                                                    |   |
| 6  |                            |     |                                                                    |   |
| 7  |                            |     |                                                                    |   |
| 8  |                            |     |                                                                    |   |
| 9  |                            |     |                                                                    |   |
| 10 | Researcher characteristics | #6  | Researchers' characteristics that may influence the research,      | 7 |
| 11 | and reflexivity            |     | including personal attributes, qualifications / experience,        |   |
| 12 |                            |     | relationship with participants, assumptions and / or               |   |
| 13 |                            |     | presuppositions; potential or actual interaction between           |   |
| 14 |                            |     | researchers' characteristics and the research questions,           |   |
| 15 |                            |     | approach, methods, results and / or transferability                |   |
| 16 |                            |     |                                                                    |   |
| 17 |                            |     |                                                                    |   |
| 18 |                            |     |                                                                    |   |
| 19 |                            |     |                                                                    |   |
| 20 | Context                    | #7  | Setting / site and salient contextual factors; rationale           | 6 |
| 21 |                            |     |                                                                    |   |
| 22 | Sampling strategy          | #8  | How and why research participants, documents, or events were       | 6 |
| 23 |                            |     | selected; criteria for deciding when no further sampling was       |   |
| 24 |                            |     | necessary (e.g. sampling saturation); rationale                    |   |
| 25 |                            |     |                                                                    |   |
| 26 |                            |     |                                                                    |   |
| 27 | Ethical issues pertaining  | #9  | Documentation of approval by an appropriate ethics review          | 7 |
| 28 | to human subjects          |     | board and participant consent, or explanation for lack thereof;    |   |
| 29 |                            |     | other confidentiality and data security issues                     |   |
| 30 |                            |     |                                                                    |   |
| 31 |                            |     |                                                                    |   |
| 32 |                            |     |                                                                    |   |
| 33 | Data collection methods    | #10 | Types of data collected; details of data collection procedures     | 7 |
| 34 |                            |     | including (as appropriate) start and stop dates of data collection |   |
| 35 |                            |     | and analysis, iterative process, triangulation of sources /        |   |
| 36 |                            |     | methods, and modification of procedures in response to             |   |
| 37 |                            |     | evolving study findings; rationale                                 |   |
| 38 |                            |     |                                                                    |   |
| 39 |                            |     |                                                                    |   |
| 40 |                            |     |                                                                    |   |
| 41 | Data collection            | #11 | Description of instruments (e.g. interview guides,                 | 7 |
| 42 | instruments and            |     | questionnaires) and devices (e.g. audio recorders) used for data   |   |
| 43 | technologies               |     | collection; if / how the instruments(s) changed over the course    |   |
| 44 |                            |     | of the study                                                       |   |
| 45 |                            |     |                                                                    |   |
| 46 |                            |     |                                                                    |   |
| 47 |                            |     |                                                                    |   |
| 48 | Units of study             | #12 | Number and relevant characteristics of participants, documents,    | 7 |
| 49 |                            |     | or events included in the study; level of participation (could be  |   |
| 50 |                            |     | reported in results)                                               |   |
| 51 |                            |     |                                                                    |   |
| 52 |                            |     |                                                                    |   |
| 53 | Data processing            | #13 | Methods for processing data prior to and during analysis,          | 7 |
| 54 |                            |     | including transcription, data entry, data management and           |   |
| 55 |                            |     | security, verification of data integrity, data coding, and         |   |
| 56 |                            |     | anonymisation / deidentification of excerpts                       |   |
| 57 |                            |     |                                                                    |   |
| 58 |                            |     |                                                                    |   |
| 59 |                            |     |                                                                    |   |
| 60 |                            |     |                                                                    |   |

|    |                                                                                              |     |                                                                                                                                                                                                                                                                                                          |            |
|----|----------------------------------------------------------------------------------------------|-----|----------------------------------------------------------------------------------------------------------------------------------------------------------------------------------------------------------------------------------------------------------------------------------------------------------|------------|
| 1  | Data analysis                                                                                | #14 | Process by which inferences, themes, etc. were identified and developed, including the researchers involved in data analysis; usually references a specific paradigm or approach; rationale                                                                                                              | 7          |
| 2  |                                                                                              |     |                                                                                                                                                                                                                                                                                                          |            |
| 3  |                                                                                              |     |                                                                                                                                                                                                                                                                                                          |            |
| 4  |                                                                                              |     |                                                                                                                                                                                                                                                                                                          |            |
| 5  |                                                                                              |     |                                                                                                                                                                                                                                                                                                          |            |
| 6  | Techniques to enhance trustworthiness                                                        | #15 | Techniques to enhance trustworthiness and credibility of data analysis (e.g. member checking, audit trail, triangulation); rationale                                                                                                                                                                     | 7          |
| 7  |                                                                                              |     |                                                                                                                                                                                                                                                                                                          |            |
| 8  |                                                                                              |     |                                                                                                                                                                                                                                                                                                          |            |
| 9  |                                                                                              |     |                                                                                                                                                                                                                                                                                                          |            |
| 10 |                                                                                              |     |                                                                                                                                                                                                                                                                                                          |            |
| 11 | Syntheses and interpretation                                                                 | #16 | Main findings (e.g. interpretations, inferences, and themes); might include development of a theory or model, or integration with prior research or theory                                                                                                                                               | 8-9        |
| 12 |                                                                                              |     |                                                                                                                                                                                                                                                                                                          |            |
| 13 |                                                                                              |     |                                                                                                                                                                                                                                                                                                          |            |
| 14 |                                                                                              |     |                                                                                                                                                                                                                                                                                                          |            |
| 15 |                                                                                              |     |                                                                                                                                                                                                                                                                                                          |            |
| 16 |                                                                                              |     |                                                                                                                                                                                                                                                                                                          |            |
| 17 | Links to empirical data                                                                      | #17 | Evidence (e.g. quotes, field notes, text excerpts, photographs) to substantiate analytic findings                                                                                                                                                                                                        | See note 1 |
| 18 |                                                                                              |     |                                                                                                                                                                                                                                                                                                          |            |
| 19 |                                                                                              |     |                                                                                                                                                                                                                                                                                                          |            |
| 20 |                                                                                              |     |                                                                                                                                                                                                                                                                                                          |            |
| 21 | Intergration with prior work, implications, transferability and contribution(s) to the field | #18 | Short summary of main findings; explanation of how findings and conclusions connect to, support, elaborate on, or challenge conclusions of earlier scholarship; discussion of scope of application / generalizability; identification of unique contributions(s) to scholarship in a discipline or field | 10         |
| 22 |                                                                                              |     |                                                                                                                                                                                                                                                                                                          |            |
| 23 |                                                                                              |     |                                                                                                                                                                                                                                                                                                          |            |
| 24 |                                                                                              |     |                                                                                                                                                                                                                                                                                                          |            |
| 25 |                                                                                              |     |                                                                                                                                                                                                                                                                                                          |            |
| 26 |                                                                                              |     |                                                                                                                                                                                                                                                                                                          |            |
| 27 |                                                                                              |     |                                                                                                                                                                                                                                                                                                          |            |
| 28 |                                                                                              |     |                                                                                                                                                                                                                                                                                                          |            |
| 29 | Limitations                                                                                  | #19 | Trustworthiness and limitations of findings                                                                                                                                                                                                                                                              | 11         |
| 30 |                                                                                              |     |                                                                                                                                                                                                                                                                                                          |            |
| 31 | Conflicts of interest                                                                        | #20 | Potential sources of influence of perceived influence on study conduct and conclusions; how these were managed                                                                                                                                                                                           | 12         |
| 32 |                                                                                              |     |                                                                                                                                                                                                                                                                                                          |            |
| 33 |                                                                                              |     |                                                                                                                                                                                                                                                                                                          |            |
| 34 |                                                                                              |     |                                                                                                                                                                                                                                                                                                          |            |
| 35 | Funding                                                                                      | #21 | Sources of funding and other support; role of funders in data collection, interpretation and reporting                                                                                                                                                                                                   | 12         |
| 36 |                                                                                              |     |                                                                                                                                                                                                                                                                                                          |            |
| 37 |                                                                                              |     |                                                                                                                                                                                                                                                                                                          |            |
| 38 |                                                                                              |     |                                                                                                                                                                                                                                                                                                          |            |
| 39 |                                                                                              |     |                                                                                                                                                                                                                                                                                                          |            |

## Author notes

1. 8-9, Table 3

The SRQR checklist is distributed with permission of Wolters Kluwer © 2014 by the Association of American Medical Colleges. This checklist was completed on 02. April 2019 using <https://www.goodreports.org/>, a tool made by the [EQUATOR Network](#) in collaboration with [Penelope.ai](#)

# BMJ Open

## What is Clinician Presence? A qualitative interview study comparing physician and non-physician insights about practices of human connection

|                                 |                                                                                                                                                                                                                                                                                                                                                                                                                                                              |
|---------------------------------|--------------------------------------------------------------------------------------------------------------------------------------------------------------------------------------------------------------------------------------------------------------------------------------------------------------------------------------------------------------------------------------------------------------------------------------------------------------|
| Journal:                        | <i>BMJ Open</i>                                                                                                                                                                                                                                                                                                                                                                                                                                              |
| Manuscript ID                   | bmjopen-2019-030831.R1                                                                                                                                                                                                                                                                                                                                                                                                                                       |
| Article Type:                   | Original research                                                                                                                                                                                                                                                                                                                                                                                                                                            |
| Date Submitted by the Author:   | 03-Sep-2019                                                                                                                                                                                                                                                                                                                                                                                                                                                  |
| Complete List of Authors:       | Brown-Johnson, Cati; Stanford University,<br>Schwartz, Rachel; Stanford University<br>Maitra, Amrapali; Stanford University<br>Haverfield, Marie; Stanford University<br>Tierney, Aaron; Stanford University<br>Shaw, Jonathan G; Stanford University<br>Zionts, Dani; Stanford University<br>Safaeinili, Nadia; Stanford University<br>Thadaney, Sonoo; Stanford University<br>Verghese, Abraham; Stanford University<br>Zulman, Donna; Stanford University |
| <b>Primary Subject Heading</b>: | Patient-centred medicine                                                                                                                                                                                                                                                                                                                                                                                                                                     |
| Secondary Subject Heading:      | Medical education and training, Health services research, General practice / Family practice, Communication, Qualitative research                                                                                                                                                                                                                                                                                                                            |
| Keywords:                       | physician-patient relationships, QUALITATIVE RESEARCH, burnout, physician presence, PRIMARY CARE, Physician-patient relationships, qualitative research, burnout, clinician presence, primary health care                                                                                                                                                                                                                                                    |
|                                 |                                                                                                                                                                                                                                                                                                                                                                                                                                                              |

SCHOLARONE™  
Manuscripts

1  
2  
3  
4  
5 What is Clinician Presence? A qualitative interview study comparing physician and non-  
6  
7 physician insights about practices of human connection  
8  
9

10  
11  
12 Authors: Cati G. Brown-Johnson, PhD, Rachel Schwartz, PhD, Amrapali Maitra, MD, PhD,  
13  
14 Marie C. Haverfield, PhD, Aaron A. Tierney, Jonathan G. Shaw, MD, Dani L. Zions, MPH,  
15  
16 Nadia Safaeinili, MPH, Sonoo Thadaney, MBA, Abraham Verghese, MD, Donna M. Zulman,  
17  
18 MD  
19  
20  
21  
22

23 Affiliations:

24  
25  
26 C.G. Brown-Johnson is a social science research scholar, Division of Primary Care & Population  
27  
28 Health, Stanford University School of Medicine, Stanford, CA  
29  
30  
31

32  
33 R. Schwartz is a Health Services Research Fellow at the Center for Innovation to Implementation  
34  
35 (Ci2i), VA Palo Alto Health Care System, Menlo Park, CA and a postdoctoral fellow at the  
36  
37 Stanford University Center for Health Policy and Center for Primary Care and Outcomes  
38  
39 Research  
40  
41  
42  
43

44 A. Maitra is a resident physician and clinical fellow in medicine at Brigham and Women's  
45  
46 Hospital, Harvard Medical School, Boston, MA  
47  
48  
49  
50

51 M.C. Haverfield is a postdoctoral scholar, Center for Innovation to Implementation (Ci2i), VA  
52  
53 Palo Alto Health Care System, Menlo Park, CA  
54  
55  
56  
57  
58  
59  
60

1  
2  
3 A.A. Tierney is research assistant, Division of Primary Care & Population Health, Stanford  
4  
5 University School of Medicine, Stanford, CA  
6  
7  
8  
9

10 J.G. Shaw is assistant professor, Division of Primary Care & Population Health, Stanford  
11  
12 University School of Medicine, Stanford, CA  
13  
14  
15

16  
17 D.L. Zions is a social science research associate, Division of Primary Care & Population Health,  
18  
19 Stanford University School of Medicine, Stanford, CA  
20  
21  
22

23  
24 N. Safaeinili is a social science research associate, Division of Primary Care & Population  
25  
26 Health, Stanford University School of Medicine, Stanford, CA  
27  
28  
29

30  
31 S. Thadaney is executive director, Presence and the Program in Bedside Medicine, Stanford  
32  
33 University School of Medicine, Stanford, CA  
34  
35  
36

37  
38 A. Verghese is professor, Presence and the Program in Bedside Medicine, Stanford University  
39  
40 School of Medicine, Stanford, CA  
41  
42  
43

44  
45 D. Zulman is associate professor, Division of Primary Care & Population Health, Stanford  
46  
47 University School of Medicine, Stanford, CA  
48  
49  
50

51  
52 Correspondence should be addressed to:  
53

54  
55 Cati Brown-Johnson  
56  
57  
58  
59  
60

1  
2  
3 Division of Primary Care and Population Health  
4

5  
6 Stanford University School of Medicine  
7

8  
9 Stanford MSOB, 1265 Welch Rd x216  
10

11  
12 Palo Alto, CA 94305  
13

14  
15 Telephone: (650) 736-3394  
16

17  
18 Email: [catibj@stanford.edu](mailto:catibj@stanford.edu)  
19

20  
21  
22 Please note:  
23

24  
25  
26 Word count: 1246  
27

28  
29  
30  
31 Numbers of tables: 2  
32

33  
34  
35 Keywords: Physician-patient relationships, qualitative research, burnout, clinician presence,  
36  
37 primary health care  
38  
39  
40  
41  
42  
43  
44  
45  
46  
47  
48  
49  
50  
51  
52  
53  
54  
55  
56  
57  
58  
59  
60



## Abstract

Objective: We sought to investigate the concept and practices of “clinician presence,” exploring how physicians and professionals create connection, engage in interpersonal interaction, and build trust with individuals across different circumstances and contexts.

Design: In 2017-18, we conducted qualitative semi-structured interviews with 10 physicians and 30 non-medical professionals from the fields of protective services, business, management, education, art/design/entertainment, social services, and legal/personal services.

Setting: Physicians were recruited from primary care clinics in an academic medical center, a Veterans Affairs clinic, and a federally-qualified health center.

Participants: Participants were 55% male and 45% female; 40% were non-white.

Results: Qualitative analyses yielded a definition of presence as *a purposeful practice of awareness, focus, and attention with the intent to understand and connect with individuals/patients*. For both medical and non-medical professionals, creating presence requires managing and considering time and environmental factors; for physicians in particular, this includes managing and integrating technology. Listening was described as central to creating the state of being present. Within a clinic, presence might manifest as a physician listening without interrupting, focusing intentionally on the patient, taking brief re-centering breaks throughout a clinic day; and informing patients when attention must be redirected to administrative or technological demands.

1  
2  
3  
4  
5  
6 Conclusions: Clinician presence involves learning to step back, pause, and be prepared to receive  
7  
8 a patient's story. Building on strategies from physicians and non-medical professionals, clinician  
9  
10 presence is best enacted through purposeful intention to connect, conscious navigation of time,  
11  
12 and proactive management of technology and the environment in order to focus attention on the  
13  
14 patient. Everyday practice or ritual supporting these strategies could support physician self-care  
15  
16 as well as physician-patient connection.  
17  
18  
19  
20  
21

### 22 **Strengths and limitations of this study**

- 23  
24  
25  
26 • Strengths of this study include its novelty; this is the first study to use human-centered  
27  
28 design principles and methods to systematically define clinician *presence*.  
29
- 30  
31 • This study uses interviews with physicians and non-physician intentionally to broaden  
32  
33 potential options and strategies for creating presence with patients beyond those typically  
34  
35 considered in strictly medical settings.  
36
- 37  
38 • Limitations included a modest dataset (n=40), which is acceptable for a qualitative  
39  
40 investigation, and which adequately addressed thematic saturation and coherence.  
41  
42  
43  
44  
45  
46  
47  
48  
49  
50  
51  
52  
53  
54  
55  
56  
57  
58  
59  
60

## Introduction

The practice of medicine today is challenging for a number of reasons, including data-entry requirements, rapid patient turnover, inadequate reimbursement, lack of administrative support, competing demands, litigious environment, and increased complexity of patients. The demands of practicing modern medicine present many barriers to physicians' ability to deliver humanistic, patient-centered care and uphold the ideals of medicine.<sup>1</sup>

Patient experience suffers in an overburdened healthcare system, and meanwhile the rates of physician burnout have reached alarming levels. Almost half of providers in the US show evidence of burnout.<sup>2,3</sup> Burnout is historically related to emotional exhaustion,<sup>4</sup> but for some clinicians may manifest as depersonalization and disengagement.<sup>5</sup>

While it is widely understood that system-level interventions are needed to address burnout, interventions that facilitate clinician engagement and mindfulness can also be helpful.<sup>6</sup> At the individual level, successfully being more “present” may make space for physicians to reconnect with the personal rewards of clinical practice, even if little else changes.

Working concepts of “presence” incorporate practice-oriented insights from across clinical care and research—including provider burnout,<sup>2</sup> patient-physician communication,<sup>7</sup> and patient-centered care<sup>8</sup>—and diverse other fields, ranging from business to education. However, there is little literature on “clinician presence.” Other studies addressing this concept have been focused

1  
2  
3 in niche areas such as psychology/psychotherapy,<sup>9</sup> palliative care,<sup>10</sup> or family and caregiver  
4 healthcare experience.<sup>11</sup> These few studies have presented clinician presence as a state of  
5 mindfulness,<sup>9</sup> “compassionate silence” originating from within a contemplative practice,<sup>10</sup> or a  
6 patient-provider “shared presence” that relies on engagement of both parties.<sup>11</sup>  
7  
8  
9  
10  
11  
12

13  
14 Our research around defining presence seeks to outline the important elements of clinician  
15 presence, and to specifically decouple it from patient-provider communication, which is bi-  
16 directional. Clinician presence in our view can be enacted by physicians, with or without active  
17 patient reception. Although the term is commonly used, our research question centered on  
18 identifying a universal definition for clinician presence using qualitative data from interviews  
19 with primary care physicians and non-medical professionals from diverse fields in which human  
20 connection is central.  
21  
22  
23  
24  
25  
26  
27  
28  
29  
30  
31  
32

## 33 **Methods**

34  
35  
36  
37

38 We conducted a qualitative study of semi-structured interviews in 2017-18 with physicians and  
39 non-medical professionals in California. Team members trained in qualitative methods (CBJ, RS,  
40 DLZ, and NS) interviewed 10 internal medicine and family medicine physicians practicing in 3  
41 primary care clinics at an academic medical center, a Veterans Affairs facility, and a federally-  
42 qualified health center serving primarily Spanish-speaking immigrants. Interview recordings and  
43 transcripts were stored in PHI and HIPAA-compliant secure files, and were only available to  
44 research staff. Files were anonymous in the case of non-medical professionals, and de-identified  
45 for physicians, retaining only role and system indicators (eg. Provider1\_System1).  
46  
47  
48  
49  
50  
51  
52  
53  
54  
55  
56  
57  
58  
59  
60

1  
2  
3 Considering the scale of barriers that medicine is facing, from rising costs to provider shortages,  
4 some have called for researchers and planners to look for solutions outside of medicine. One  
5 such approach is human-centered design, which leverages insights from stakeholders at every  
6 level of design practice, and has been specifically called for in terms of building resilience in  
7 medicine.<sup>12</sup> We employed a human-centered design approach that leveraged analogous  
8 inspiration, a strategy that has been used by engineers when there is little precedent: analogous  
9 domains must be examined as a starting point from which possible context-dependent solutions  
10 can be developed.<sup>13</sup> Since little has been systematically documented about clinician presence in  
11 medicine, we intentionally wanted to reach beyond medicine to gather insights from analogous  
12 domains. In general, human-centered design and analogous inspiration gives us the opportunity  
13 to learn for elegant solutions that may already exist, but have not yet been utilized in the medical  
14 setting.

15  
16 We used convenience sampling to interview 30 individuals systematically representing a variety  
17 of non-medical professions from 11 of the 25 occupation groups listed by the US Bureau of  
18 Labor Statistics (Table 1). Using the concept of analogous inspiration, we intentionally targeted  
19 professionals whose work involves fostering effective connections with individuals, often under  
20 stressful circumstances. We used a convenience sampling technique to identify participants, and  
21 intentionally recruited from diverse fields to create a sample representative of the range of  
22 careers.

23  
24 Overall, participants were balanced in terms of gender (55% male, 45% female), and represented  
25 a diversity of race/ethnicities while skewing white/Caucasian (60%) (Table 2). Ethical approval  
26 was granted for this study by the Stanford IRB, protocol 42397; October 26, 2017.

1  
2  
3 Interviews explored the concept of “presence” with questions about creating connection, being  
4 more present, building trust, adjusting strategies for different people, and navigating the  
5 environment during interactions with clients and patients (see Table 3). All interviews were  
6 recorded and transcribed, and we used the constant comparative method to code transcripts,  
7 meeting frequently as a team to discuss and workshop qualitative themes.<sup>14</sup> Interview excerpts  
8 relevant to presence were independently analyzed by two qualitative researchers (AM – MD and  
9 PhD in Anthropology; CBJ – PhD in Linguistics) to generate core elements of presence. These  
10 elements were iteratively refined into a framework using inductive coding, which enabled us to  
11 define elements of presence as they emerged from the data. Since there was not an established  
12 definition of presence prior to this work, we did not have preset codes. We discussed the  
13 definition and coding as a full research team (12 individuals with backgrounds in medicine,  
14 implementation science, health services research, physician wellness, health communication, and  
15 linguistics) weekly over the course of a month. Detailed meeting notes were kept by two project  
16 managers, and we referred back to these meeting notes from session to session. To address  
17 biases, we debated discrepancies, but also recognized and listened to minority opinions.  
18  
19 Research suggests that this kind of disagreement and welcoming of minority viewpoints results  
20 in better-quality coding and decision-making.<sup>15</sup> A working definition of presence, plus the major  
21 themes supporting this definition, were presented to our advisors and refined during discussions  
22 with the team and advisors. This resulted in: 1) a shared definition of presence; 2) a framework  
23 with several major themes supporting this definition; and 3) identification of cross-professional  
24 strategies for attaining presence. Data generated and analyzed as part of this research are not  
25 publicly posted due to potential opportunity to identify participants. However, data are available  
26 from the corresponding author on reasonable request. Protocols are also available upon request.  
27  
28  
29  
30  
31  
32  
33  
34  
35  
36  
37  
38  
39  
40  
41  
42  
43  
44  
45  
46  
47  
48  
49  
50  
51  
52  
53  
54  
55  
56  
57  
58  
59  
60

## Patient and Public Involvement

Limited public involvement in the design and analysis of this research was elicited via research-in-progress presentations to the Presence Center at Stanford University School of Medicine. Patient input was not directly requested.

## Results

Qualitative analyses yielded a definition for clinician presence as, *a purposeful practice of awareness, focus, and attention with the intent to understand and connect with individuals/patients*. Our framework focused on activities involved in creating presence: intentional connection, being aware of time, and managing the physical environment (Table 4).

### **Presence requires purposeful intention to connect.**

Several interviewees noted that connection is created through “attention,” “focus,” and “listening just to understand.” One physician described presence as “intense connected moment[s]” during the clinical interview, where “[you are] trying to understand [a patient’s] level of suffering [and] the significance of their story.” An enforcement agent stated that connection is “the goal of presence”; a chaplain defined presence as a state of “[not being] alone to each other.” Presence was also described as the absence or opposite of distraction. A journalist reflected that not paying attention could indicate “this person is not really interested...in me.”

1  
2  
3 Our definition of presence as “purposeful” practices intentionally includes both *deliberate*  
4 practices – practices that you intentionally choose to do – and also doing practices *for a purpose*,  
5 with the goal of achieving specific results. Deliberate practices and goals overlapped, informing  
6 our choice of the word “purposeful,” and included: making an agenda “so we’re clear”  
7 (physician); making a connection (high school health educator); determining how truthful people  
8 are being (enforcement agent); identifying skills and resources people need to get tasks done  
9 (software company director); listening to understand, not to develop a response (hospice  
10 volunteer); trying to empower patients (physician); supporting the feeling of making a difference  
11 (physician); and engendering trust through participant empowerment (documentary filmmaker).  
12 We see in our data that presence is central to the goals of patient care, including connecting and  
13 listening, and also to the care of the humanity of the provider, promoting resiliency for them  
14 through feeling that they make a difference.  
15  
16  
17  
18  
19  
20  
21  
22  
23  
24  
25  
26  
27  
28  
29  
30  
31  
32

33 Interviewees described removing distractions and being prepared as key strategies to achieving  
34 purposeful intention. Some mentioned removing both literal and figurative distractions. A  
35 restorative justice lawyer described a personal ritual of brushing off external or intruding  
36 thoughts and feelings between encounters to be more present, and repeating: “Now. Here. This.”  
37 Several physicians described the value of arriving early to review charts and plan, in order to  
38 enter into visits feeling prepared.  
39  
40  
41  
42  
43  
44  
45  
46  
47  
48

### 49 **Presence requires conscious navigation of time.**

50  
51  
52 Presence was described as something temporal and tangible, happening during a specific time,  
53 and requiring protective boundaries. Time was referenced repeatedly, for example “taking a  
54  
55  
56  
57  
58  
59  
60



1  
2  
3 minute to notice” (health promoter). Echoing its root in the concept of being in the present,  
4  
5 presence was defined as not thinking ahead but instead returning to the current moment. An  
6  
7 enforcement agent also referenced presence as being aware “in real time.”  
8  
9

10  
11 Strategies related to presence and time included prioritizing brief quiet time for reflective “re-  
12  
13 centering” breaks that physicians and professionals mentioned needing between patients/clients.  
14  
15 A physician also suggested “not filling every moment” of the day with technological distractions  
16  
17 to allow more time for presence. Some physicians bemoaned the lack of time for self-reflection:  
18  
19 “I don't go home saying, ‘That was a great day,’ I go home saying, ‘I've got all this other work to  
20  
21 do.’” By contrast, a teacher valued the “bit of time to debrief” with colleagues as valuable  
22  
23 because it helped them process and be ready for the next day.  
24  
25  
26  
27  
28  
29

30  
31 Providers acknowledged that “time with the patient [is] the key...An offhand comment when  
32  
33 you're talking about shoulder pain could lead you down to more chest pain.” In addition to being  
34  
35 able to use time to explore medical content, physicians reported needing more time “to keep  
36  
37 track of the growing data set” generated by the electronic health record (EHR).  
38  
39  
40

### 41 **Presence requires awareness of the physical environment.**

42  
43  
44

45  
46 Presence was described in terms of its physical qualities. This included concrete factors such as  
47  
48 positioning and spacing (“being physically there”), and also more abstract physical sensations:  
49  
50 “you feel it when the temperature changes in the room.” All interviewees described the pull of  
51  
52 competing priorities, with physicians particularly highlighting the challenge that administrative-  
53  
54  
55  
56  
57  
58  
59  
60

1  
2  
3 demands and the EHR pose for presence, particularly because some providers expressed that it is  
4  
5 “rude for somebody to look at a screen and not look at the person in front of them.”  
6  
7

8  
9  
10 Interviewees used space as a metaphor. In addition to referring to the literal physical  
11  
12 environment, the use of “space” also referenced the emotional and relational environment.  
13

14 Discussion of space was both literal “the sound, the seats, the space, the rooms set up in a circle,”  
15  
16 and metaphorical “presence allows the space for the unknown and clinicians aren’t comfortable  
17  
18 with the unknown.” Participants (physician, recreational therapist, design researcher, health  
19  
20 promotor) often equated presence with space, as in “holding space,” or “letting enough space in.”  
21  
22  
23

24  
25 Strategies related to presence and space emphasized that, as with other physical spaces, presence  
26  
27 requires boundaries. Participants created presence by determining who would be in the room and  
28  
29 setting boundaries for how much personal information to share. To combat the distancing effects  
30  
31 of technology, physicians described putting away phones during clinic visits and avoiding email.  
32  
33  
34 In addition, some physicians discussed strategies that preserved connection with patients during  
35  
36 technology use: “presence is also letting them know... [you’re] looking something up [in the  
37  
38 health record].”  
39  
40  
41

42  
43 Physicians also utilized up-front expectation setting and help from team-members to support  
44  
45 boundaries on time. For instance, physicians would communicate from the start of the visit with  
46  
47 patients about boundaries of time, for example for the patient who arrived late: “[it’s] gonna be a  
48  
49 short visit.” However, physicians were reluctant to interrupt patients on account of time, even if  
50  
51 the visit was running over. In team-based practices, staff would also support boundaries around  
52  
53  
54  
55  
56  
57  
58  
59  
60

1  
2  
3 time by establishing visit length expectations during the rooming process, and knocking/entering  
4  
5 the clinic room to communicate when a visit had gone too long.  
6  
7  
8

## 9 10 **Discussion**

11  
12  
13  
14  
15 In this study of physicians and non-medical professionals whose jobs involve human connection,  
16  
17 we found that presence is a universal concept that involves intentionality, focus, and attention to  
18  
19 time and the physical environment. A growing body of work has explored presence in the  
20  
21 context of healthcare system/intervention design,<sup>16-19</sup> and has focused on clinical conditions,  
22  
23 actions, or training to make presence possible. To our knowledge, however, this is the first study  
24  
25 to systematically generate a definition for presence, which may help guide research and  
26  
27 interventions that leverage insights from within and outside the field of medicine.  
28  
29  
30

### 31 32 33 **Presence vis-a-vis connection, empathy, and mindfulness**

34  
35  
36  
37 Presence rightly overlaps with other core areas of patient-provider interactions, such as  
38  
39 connection, empathy, and emotions (both those of the patient and the physician). Extensive work  
40  
41 in the realm of relational communication can be leveraged to support presence and shed light on  
42  
43 how clinician presence might be achieved, for instance by attending to patient stories, avoiding  
44  
45 interruptions, using silence and reflective listening, setting agendas, and harnessing non-verbal  
46  
47 communication skills such as eye contact and leaning in.  
48  
49  
50

51  
52  
53 Furthermore, research in the interface between emotional awareness/empathy and presence could  
54  
55 enrich both concepts. Empathy and emotional awareness exhibited by providers builds trust,<sup>20</sup>  
56  
57  
58

1  
2  
3 but the documented “emotional labor” of empathy in clinical care is substantial.<sup>21</sup> The support  
4 that physicians need both in managing responses to patient emotions and regulating their own  
5 emotional wellbeing could be addressed through clinician presence. Presence may consist of a  
6 set of behaviors, skills, and rituals allowing providers to better care for patients in distress. It  
7 may also support physicians in allowing for structured rituals, such as a few deep breaths before  
8 entering into patient rooms, that are known to support regulation of emotional experience by  
9 changing neurological and physical responses in the body.<sup>22</sup>  
10  
11  
12  
13  
14  
15  
16  
17  
18  
19  
20

21 Defining clinical presence gives medicine the conceptual language to examine unexplored  
22 elements of patient-provider connection that not only enhance patient care, but also enrich  
23 provider experience of their role as healers. Today’s technology-saturated clinic environment is  
24 driving demand for interventions that foster human connection; an intervention focused on  
25 presence is a natural next step to address human disconnection in busy clinics.  
26  
27  
28  
29  
30  
31  
32  
33  
34

35 Our interest in presence is motivated by the need to synthesize approaches from connection,  
36 communication, and partnership in the context of the clinic visit. We are also driven by the  
37 conviction that while fundamentals of communication, emotional awareness, or even perfected  
38 clinic flow are indeed steps towards achieving better patient outcomes, there is more to healing  
39 than any individual practice in these domains. Our framework for presence may facilitate  
40 continued conversation about the role of physicians as scientists, detectives, empaths, and  
41 healers.  
42  
43  
44  
45  
46  
47  
48  
49  
50  
51  
52

### 53 **What could Presence look like?**

54  
55  
56  
57  
58  
59  
60

1  
2  
3 The features of presence lend themselves to specific practices that warrant further exploration,  
4 particularly in the areas of listening/silence, contextual awareness, and mindfulness. Presence  
5 involves learning to step back, pause, suspend expectations, and receive and connect with  
6 someone's story. Physicians interrupt their patients early and often<sup>23</sup>— an emphasis on listening  
7 as a prerequisite for presence opens conceptual and curricular space for teaching not only how to  
8 communicate, but when to stay silent.  
9

10  
11 Presence also lies at the juncture of interactions within clinical spaces; respondents described  
12 that it hangs in the air, is felt as a physical quality, or emanates between two people whose goals  
13 are aligned. Because presence is influenced by contextual factors for many professionals,  
14 teaching physicians to consider their physical environment could help preserve and channel  
15 connections. Specific approaches from the literature include sharing the screen so that the EHR  
16 is fully integrated into the visit, providing panel management support or scribe services,  
17 leveraging technical solutions to help support clinical decision-making, and maximizing the  
18 efficiency of the EHR.<sup>24,25</sup>  
19  
20  
21  
22  
23  
24  
25  
26  
27  
28  
29  
30  
31  
32  
33  
34  
35  
36  
37  
38

39 Looking ahead as the United States population ages, best practices for communication and  
40 connection will need to be expanded beyond the traditional patient-provider dyad. Exploring  
41 presence may help us address the integration of caregivers, friends, and family into clinic visits  
42 and relationships with providers. Finally, mindfulness may be an important component of  
43 presence in training and clinical interactions, where even very minimal levels of effort (<5  
44 minutes daily) may demonstrate benefit.  
45  
46  
47  
48  
49  
50  
51  
52  
53  
54

## 55 **Limitations**

56  
57  
58  
59  
60

1  
2  
3 Several limitations warrant discussion. First, study findings were derived from a small sample of  
4 physicians and non-medical professionals. Nevertheless, we found that we reached thematic  
5 saturation and coherence with 40 participants. Second, the study was limited to the perspective of  
6 primary care clinicians and other professionals. Future efforts should evaluate the impact of  
7 presence on patients, particularly since research has documented that physicians often  
8 overestimate their ability to communicate effectively.<sup>26</sup> In addition, the study's focus on  
9 individual practices to achieve presence has the potential to obscure the critical need for system-  
10 based interventions that address time pressure and technology intrusions. To be clear, while our  
11 findings suggest that presence is a central and important part of high-quality care that can  
12 support wellness for both patients and providers, the full onus of system change should not be  
13 placed on physicians. Misplacing the burden of responsibility solely on individual physicians  
14 without addressing system-level issues could in fact have unintended consequences of increasing  
15 expectations without adding support, which has been linked to increased burnout.<sup>27</sup>  
16  
17  
18  
19  
20  
21  
22  
23  
24  
25  
26  
27  
28  
29  
30  
31  
32  
33  
34

## 35 **Conclusion**

36  
37 In conclusion, human connection is central to clinical care; while challenging to cultivate, this  
38 connection offers some of the greatest rewards for practicing physicians. Insights from  
39 physicians and non-medical professionals suggest that clinician presence may be achieved  
40 through purposeful intention to connect, conscious navigation of time, and proactive  
41 management of technology and the environment in order to focus attention on the patient.  
42  
43 Adopting intentional practices to support presence may make physicians more receptive to  
44 patient stories and facilitate meaningful exchanges that are critical to accurate diagnosis, clinical  
45 decision-making, and therapeutic interactions for both patients and physicians.  
46  
47  
48  
49  
50  
51  
52  
53  
54  
55  
56  
57  
58  
59  
60

1  
2  
3 Acknowledgments: None  
4  
5

6 Funding/Support: This study was supported by a grant from the Gordon and Betty Moore  
7 Foundation (#6382). RS and MCH were supported by a VA Office of Academic Affairs  
8 Advanced Fellowship in Health Services Research. The views expressed herein are those of the  
9 authors and do not necessarily reflect the views of the Department of Veterans Affairs.  
10  
11  
12  
13  
14  
15

16  
17  
18 Conflicts of Interest:

19  
20 Dr. Cati Brown-Johnson reports grants from the Gordon and Betty Moore Foundation (#6382),  
21 during the conduct of the study.  
22

23  
24 Dr. Rachel Schwartz reports grants from the Gordon and Betty Moore Foundation (#6382) and  
25 VA Office of Academic Affairs Advanced Fellowship, during the conduct of the study.  
26

27  
28 Dr. Amrapali Maitra has nothing to disclose.  
29

30  
31 Dr. Marie Haverfield reports grants from the Gordon and Betty Moore Foundation (#6382) and  
32 VA Office of Academic Affairs Advanced Fellowship, during the conduct of the study.  
33

34  
35 Mr. Aaron Tierney reports grants from the Gordon and Betty Moore Foundation (#6382), during  
36 the conduct of the study.  
37  
38

39  
40 Dr. Jonathan Shaw reports grants from the Gordon and Betty Moore Foundation (#6382), during  
41 the conduct of the study.  
42  
43

44  
45 Ms. Dani Zionts reports grants from the Gordon and Betty Moore Foundation (#6382), during  
46 the conduct of the study.  
47  
48

49  
50 Ms. Nadia Safaeinili reports grants from the Gordon and Betty Moore Foundation (#6382),  
51 during the conduct of the study.  
52  
53  
54  
55  
56  
57  
58  
59  
60

1  
2  
3 Ms. Sonoo Thadaney reports grants from the Gordon and Betty Moore Foundation (#6382),  
4 during the conduct of the study.  
5  
6

7 Dr. Abraham Verghese reports grants from the Gordon and Betty Moore Foundation (#6382),  
8 during the conduct of the study.  
9  
10

11 Dr. Donna Zulman reports grants from the Gordon and Betty Moore Foundation (#6382), during  
12 the conduct of the study.  
13  
14

15 Ethical approval: Ethical approval has been granted for this study by the Stanford IRB, protocol  
16 42397; October 26, 2017.  
17  
18

19 Disclaimer: None.  
20  
21

22 Previous presentations: None.  
23  
24

25 Authors' contributions  
26  
27

28 CBJ was involved in data collection and analysis. She also was the primary author of the  
29 manuscript.  
30  
31

32 RS was involved in data collection and analysis. She also was a major contributor to writing the  
33 manuscript.  
34  
35

36 AM was involved in data collection and analysis. She also was a primary contributor to the  
37 manuscript.  
38  
39



1  
2  
3 MCH was involved in data collection and analysis. She also contributed significant edits to the  
4  
5 manuscript.  
6  
7  
8

9  
10 AT was involved in data collection and analysis. He also contributed significant edits to the  
11  
12 manuscript.  
13  
14  
15

16 JGS was involved in research design, data collection and also contributed significant edits to the  
17  
18 manuscript.  
19  
20  
21  
22

23 DLZ was involved in data collection and analysis. She also contributed significant edits to the  
24  
25 manuscript.  
26  
27  
28

29 NS was involved in data collection and analysis. She also contributed significant edits to the  
30  
31 manuscript.  
32  
33  
34  
35

36 ST was involved in research design and also contributed significant edits to the manuscript.  
37  
38  
39

40 AV was involved in research design and also contributed significant edits to the manuscript.  
41  
42  
43

44 DMZ was involved in research design and data collection, and also contributed significant edits  
45  
46 to the manuscript.  
47  
48  
49

50  
51 All authors read and approved the final manuscript.  
52  
53  
54  
55  
56  
57  
58  
59  
60

1  
2  
3  
4  
5  
6  
7 Data Availability:

8  
9  
10  
11 Data generated and analyzed as part of this research are not publicly posted due to potential  
12 opportunity to identify participants. However, data are available from the corresponding author  
13 on reasonable request. Protocols are also available upon request.  
14  
15  
16  
17  
18  
19  
20  
21  
22  
23  
24  
25  
26  
27  
28  
29  
30  
31  
32  
33  
34  
35  
36  
37  
38  
39  
40  
41  
42  
43  
44  
45  
46  
47  
48  
49  
50  
51  
52  
53  
54  
55  
56  
57  
58  
59  
60

## References

1. Rosenthal DI, Verghese A. Meaning and the nature of physicians' work. *N Engl J Med*. 2016;375(19):1813-1815. doi:10.1056/NEJMp1609055
2. Shanafelt TD, Boone S, Tan L, et al. Burnout and Satisfaction With Work-Life Balance Among US Physicians Relative to the General US Population. *Arch Intern Med*. 2012;172(18):1377. doi:10.1001/archinternmed.2012.3199
3. Shanafelt TD, West CP, Sinsky C, et al. Changes in Burnout and Satisfaction With Work-Life Integration in Physicians and the General US Working Population Between 2011 and 2017. *Mayo Clin Proc*. 2019;0(0). doi:10.1016/j.mayocp.2018.10.023
4. Freudenberger HJ. Staff Burn-Out. *J Soc Issues*. 1974;30(1):159-165. doi:10.1111/j.1540-4560.1974.tb00706.x
5. Leiter MP, Maslach C. Latent burnout profiles: A new approach to understanding the burnout experience. *Burn Res*. 2016;3(4):89-100. doi:10.1016/J.BURN.2016.09.001
6. Panagioti M, Panagopoulou E, Bower P, et al. Controlled Interventions to Reduce Burnout in Physicians. *JAMA Intern Med*. 2017;177(2):195. doi:10.1001/jamainternmed.2016.7674
7. Boissy A, Windover AK, Bokar D, et al. Communication Skills Training for Physicians Improves Patient Satisfaction. *J Gen Intern Med*. 2016;31(7):755-761.

- 1  
2  
3 doi:10.1007/s11606-016-3597-2  
4  
5  
6  
7  
8 8. Weissmann PF, Branch WT, Gracey CF, Haidet P, Frankel RM. Role Modeling  
9  
10 Humanistic Behavior: Learning Bedside Manner from the Experts. *Acad Med.*  
11  
12 2006;81(7):661-667. doi:10.1097/01.ACM.0000232423.81299.fe  
13  
14  
15  
16 9. Childs D. Mindfulness and the psychology of presence. *Psychol Psychother Theory, Res*  
17  
18 *Pract.* 2007;80(3):367-376. doi:10.1348/147608306X162600  
19  
20  
21  
22 10. Back AL, Bauer-Wu SM, Rushton CH, Halifax J. Compassionate Silence in the Patient–  
23  
24 Clinician Encounter: A Contemplative Approach. *J Palliat Med.* 2009;12(12):1113-1117.  
25  
26 doi:10.1089/jpm.2009.0175  
27  
28  
29  
30  
31 11. Marchand L. Shared presence: The heart of the therapeutic relationship. *Fam Syst Heal.*  
32  
33 2015;33(3):283-284. doi:10.1037/fsh0000154  
34  
35  
36  
37  
38 12. Searl MM, Borgi L, Chemali Z. It is time to talk about people: a human-centered  
39  
40 healthcare system. *Heal Res Policy Syst.* 2010;8(1):35. doi:10.1186/1478-4505-8-35  
41  
42  
43  
44  
45 13. Horsky J, Zhang J, Patel VL. To err is not entirely human: Complex technology and user  
46  
47 cognition. *J Biomed Inform.* 2005;38:264-266. doi:10.1016/j.jbi.2005.05.002  
48  
49  
50  
51 14. Glaser BG. The Constant Comparative Method of Qualitative Analysis. *Soc Probl.*  
52  
53 1965;12(4):436-445. doi:10.2307/798843  
54  
55  
56  
57  
58  
59  
60

- 1  
2  
3 15. Miller CE. The social psychological effects of group decision rules. In: Paulus P, ed.  
4  
5 *Psychology of Group Influence*. 2nd ed. Hillsdale, NJ: Erlbaum; 1989:327–355.  
6  
7  
8  
9  
10 16. Frankel R, Altschuler A, George S, et al. Effects of exam-room computing on clinician-  
11  
12 patient communication: A longitudinal qualitative study. *J Gen Intern Med*. 2005.  
13  
14 doi:10.1111/j.1525-1497.2005.0163.x  
15  
16  
17  
18 17. Sabo BM. Compassionate presence: The meaning of hematopoietic stem cell transplant  
19  
20 nursing. *Eur J Oncol Nurs*. 2011;15(2):103-111. doi:10.1016/J.EJON.2010.06.006  
21  
22  
23  
24  
25 18. Beer JM, Takayama L. Mobile remote presence systems for older adults. In: *Proceedings*  
26  
27 *of the 6th International Conference on Human-Robot Interaction - HRI '11*. New York,  
28  
29 New York, USA: ACM Press; 2011:19. doi:10.1145/1957656.1957665  
30  
31  
32  
33  
34 19. Lee BM, Curlin FA, Choi PJ. Documenting presence: A descriptive study of chaplain  
35  
36 notes in the intensive care unit. *Palliat Support Care*. 2017;15(02):190-196.  
37  
38 doi:10.1017/S1478951516000407  
39  
40  
41  
42  
43 20. Spiro HM (Howard M, Yale University. School of Medicine. *Empathy and the Practice of*  
44  
45 *Medicine : Beyond Pills and the Scalpel*. Yale University Press; 1993.  
46  
47 <https://yalebooks.yale.edu/book/9780300058406/empathy-and-practice-medicine>.  
48  
49 Accessed August 15, 2019.  
50  
51  
52  
53  
54 21. Kerasidou A, Horn R. Making space for empathy: supporting doctors in the emotional  
55  
56  
57  
58  
59  
60

- 1  
2  
3 labour of clinical care. *BMC Med Ethics*. 2016;17(1):8. doi:10.1186/s12910-016-0091-7  
4  
5  
6  
7  
8 22. Cheng KS, Han RPS, Lee PF. Neurophysiological study on the effect of various short  
9  
10 durations of deep breathing: A randomized controlled trial. *Respir Physiol Neurobiol*.  
11  
12 2018;249:23-31. doi:10.1016/J.RESP.2017.12.008  
13  
14  
15  
16 23. Marvel MK, Epstein RM, Flowers K, Beckman HB. Soliciting the patient's agenda: have  
17  
18 we improved? *JAMA*. 1999;281(3):283-287.  
19  
20 <http://www.ncbi.nlm.nih.gov/pubmed/9918487>. Accessed July 17, 2018.  
21  
22  
23  
24  
25 24. Israni ST, Verghese A. Humanizing Artificial Intelligence. *JAMA*. 2019;321(1):29.  
26  
27 doi:10.1001/jama.2018.19398  
28  
29  
30  
31  
32 25. Verghese A, Shah NH, Harrington RA. What This Computer Needs Is a Physician. *JAMA*.  
33  
34 2018;319(1):19. doi:10.1001/jama.2017.19198  
35  
36  
37  
38  
39 26. Ha JF, Longnecker N. Doctor-patient communication: A review. *Ochsner J*.  
40  
41 2010;10(1):38-43. doi:10.1043/toj-09-0040.1  
42  
43  
44  
45 27. Sinsky CA, Willard-Grace R, Schutzbank AM, Sinsky TA, Margolius D, Bodenheimer T.  
46  
47 In search of joy in practice: a report of 23 high-functioning primary care practices. *Ann*  
48  
49 *Fam Med*. 2013;11(3):272-278. doi:10.1370/afm.1531  
50  
51  
52  
53  
54  
55  
56  
57  
58  
59  
60

**Table 1. Professionals Fields from the Bureau of Labor Statistics and Occupations of Non-Medical Interviewees**

| <b>Professional field/Occupation groups</b>                   | <b>Occupations</b>                     |
|---------------------------------------------------------------|----------------------------------------|
| Management                                                    | Hospice program director               |
|                                                               | Restaurateur                           |
|                                                               | Middle school principal                |
|                                                               | CEO of a technology company            |
|                                                               | Software company director              |
| Business & Financial/ Sales                                   | Television sales and marketing         |
|                                                               | Startup sales                          |
|                                                               | Specialty beverage importer            |
|                                                               | Realtor                                |
| Community & Social Service                                    | Chaplain                               |
|                                                               | Licensed clinical social worker (LCSW) |
|                                                               | Health promoter                        |
|                                                               | Teacher                                |
| Education, Training & Library                                 | Music instructor                       |
|                                                               | High school health educator            |
|                                                               | Psychology Professor                   |
|                                                               | Special education educator             |
| Arts & Design/ Entertainment & Sports/ Media & Communications | Documentary filmmaker                  |

1  
2  
3  
4  
5  
6  
7  
8  
9  
10  
11  
12  
13  
14  
15  
16  
17  
18  
19  
20  
21  
22  
23  
24  
25  
26  
27  
28  
29  
30  
31  
32  
33  
34  
35  
36  
37  
38  
39  
40  
41  
42  
43  
44  
45  
46  
47  
48  
49  
50  
51  
52  
53  
54  
55  
56  
57  
58  
59  
60

|                            |                            |
|----------------------------|----------------------------|
|                            | Design researcher          |
|                            | Professional musician      |
|                            | Creative designer          |
|                            | Journalist                 |
| Legal / Protective Service | Firefighter/EMT (Chief)    |
|                            | Restorative justice lawyer |
|                            | Police officer             |
|                            | EPA enforcement agent      |
| Personal Care and Service  | Yoga instructor            |
|                            | Hospice volunteer          |
|                            | Recreational therapist     |
|                            | Massage therapist          |

For peer review only



**Table 2. Characteristics of participants (N=40)**

| <b>Characteristic</b>     | <b>n</b> | <b>Percentage of sample</b> |
|---------------------------|----------|-----------------------------|
| <b>Gender</b>             |          |                             |
| Male                      | 22       | 55%                         |
| Female                    | 18       | 45%                         |
| <b>Race/Ethnicity</b>     |          |                             |
| White/Caucasian           | 24       | 60%                         |
| Asian and southeast Asian | 9        | 23%                         |
| Latino/a                  | 3        | 8%                          |
| Middle Eastern            | 2        | 5%                          |
| Pacific Islander          | 1        | 3%                          |
| African American          | 1        | 3%                          |
| <b>Age (years)</b>        |          |                             |
| 20-29                     | 4        | 10%                         |
| 30-39                     | 13       | 33%                         |
| 40-49                     | 10       | 25%                         |
| 50-59                     | 13       | 33%                         |

Table 3. Questions for interview protocol

1. What do you enjoy most about what you do?
2. Can you tell me a bit about instances in your professional work where you need to make personal connections with individuals (e.g., patients, congregants, consumers, trainees, clients)?
3. What do you do to create these connections? Are there specific things that you say or non-verbal gestures or actions that you use?
4. Is there anything that you do to help you be more present (or fully emotionally available) in these moments?
5. Is there anything you do to build trust [with the people you work with]?
6. Is there anything you do to establish boundaries for the interaction? (e.g., time, etc.)
7. Is there anything in your environment that helps or hinders you when you are trying to create these connections?
8. I am curious about how you know that you've made a connection with someone. Can you think of a specific recent interaction and walk me through how you knew you made a connection?
9. Have you had times when it was difficult to connect? What did you do?
10. Do you change your strategies for different types of people? How so?
11. Do you change your strategies in different situations (e.g., in a crisis)?
12. Are there any resources that you have found useful in developing techniques to connect and be available and present with others? Are there any experts in your profession who you'd recommend we read about or contact?
13. Is there anything else that we should know about how you create these connections?
14. What does the term presence mean to you? What does connection mean to you? Listening, rapport, trust---Can you reflect on what these words mean to you?

**Table 4. Comparative exemplar quotes from a national convenience sample of physicians and non-medical professionals about themes related to presence (n=40, interviews conducted in 2017-18)**

| Theme                                  | Physicians                                                                                                                                                                                                                                                                                      | Non-Medical Professionals                                                                                                                                                                                                                      |
|----------------------------------------|-------------------------------------------------------------------------------------------------------------------------------------------------------------------------------------------------------------------------------------------------------------------------------------------------|------------------------------------------------------------------------------------------------------------------------------------------------------------------------------------------------------------------------------------------------|
| <i>Purposeful Intention to Connect</i> |                                                                                                                                                                                                                                                                                                 |                                                                                                                                                                                                                                                |
| Intention to connect                   | You want to open [communication]... You want to have people feel freedom that they can talk to you about personal things. [MD1]                                                                                                                                                                 | I think that's the goal of presence... to obtain a connection, but you may or may not get it. [EPA enforcement agent]                                                                                                                          |
| Attention                              | I think just really being there, and being already listening to them, ...So, I don't look at the computer. I just really try to look at them. [MD1]                                                                                                                                             | I like "attending" better than "presence" because it suggests that there's a relationship. [LCSW]                                                                                                                                              |
| Focus                                  | I guess it's just a complete focus on the patient at that time and at that moment, and really trying to give your undivided attention to that. [MD3]                                                                                                                                            | Staying focused on the moment, looking somebody in the eye. [Journalist]                                                                                                                                                                       |
| Listening                              | I think I've learned to just sit and listen and be present for when patients share their story about what's going on with them, and what's of interest to them, and really just giving them the space to talk about that and overcoming the urge to interrupt or direct the conversation. [MD8] | Listening and responding to them. ...one of the most difficult parts of interviewing somebody is truly listening... So, being present is truly listening. [Journalist]                                                                         |
| Focusing on the client/patient story   | The interview often with me is... that really intense connected moment where I'm really trying to understand their level of suffering, what this means to them, the significance of their story and how that impacts their life. [MD2]                                                          | Most of the times it's about hearing someone's story and about why they did something, and where it led them, and who they are now. And so those experiences change me often ...because I was present for [the story]. [Documentary filmmaker] |

1  
2  
3  
4  
5  
6  
7  
8  
9

|                 |                                                                                                                                                                                |                                                                                                         |
|-----------------|--------------------------------------------------------------------------------------------------------------------------------------------------------------------------------|---------------------------------------------------------------------------------------------------------|
| Not being alone | ...so [a patient] didn't feel like she was completely alone in that, I assessed that the best way to make her feel safe was for me to disclose my vulnerability as well. [MD2] | We haven't been alone to each other, we haven't been alone to what's greater than ourselves. [Chaplain] |
|-----------------|--------------------------------------------------------------------------------------------------------------------------------------------------------------------------------|---------------------------------------------------------------------------------------------------------|

10  
11  
12  
13  
14  
15  
16  
17

|                       |                                                                                                                                           |                                                                                                                                                                                                  |
|-----------------------|-------------------------------------------------------------------------------------------------------------------------------------------|--------------------------------------------------------------------------------------------------------------------------------------------------------------------------------------------------|
| Removing distractions | Well, so I kind of say that your baggage is packed. So it isn't spilling into the office visit or the phone call or whatever it is. [MD7] | It means kind of the opposite of distraction. It's kind of focus on your conversation and interaction with a person in real time and having a true sense of focus on it. [EPA enforcement agent] |
|-----------------------|-------------------------------------------------------------------------------------------------------------------------------------------|--------------------------------------------------------------------------------------------------------------------------------------------------------------------------------------------------|

---

### 18 *Conscious Navigation of Time*

---

19  
20  
21  
22  
23  
24  
25  
26  
27

|                          |                                                                                                                                                                |                                                                                                                                                                                                                       |
|--------------------------|----------------------------------------------------------------------------------------------------------------------------------------------------------------|-----------------------------------------------------------------------------------------------------------------------------------------------------------------------------------------------------------------------|
| Returning to the present | It is almost like a meditation where we're taught to focus on our breathing and focus, but naturally our mind wanders, and you want to check that email. [MD3] | ... the executive director of our organization..., he always uses this mantra where he says, "Now. Here. This," to stay present. And so when I remember to do that, it has been helpful. [Restorative justice lawyer] |
|--------------------------|----------------------------------------------------------------------------------------------------------------------------------------------------------------|-----------------------------------------------------------------------------------------------------------------------------------------------------------------------------------------------------------------------|

28  
29  
30  
31  
32  
33  
34  
35

|               |                                                                                                                                                                                                       |                                                                                                                                                                                                                                   |
|---------------|-------------------------------------------------------------------------------------------------------------------------------------------------------------------------------------------------------|-----------------------------------------------------------------------------------------------------------------------------------------------------------------------------------------------------------------------------------|
| Taking breaks | I take breaks, actually. I think that's been a big thing. I am no longer interested and I'm no longer capable, because of that, of this way of working where you're constantly doing something. [MD5] | Yeah, get a good sleep, making sure that [I've] eaten, making sure there's breaks, and that I have stuff with me to keep my energy going, like [chocolate] and water and stuff, whatever I need that day. [Documentary filmmaker] |
|---------------|-------------------------------------------------------------------------------------------------------------------------------------------------------------------------------------------------------|-----------------------------------------------------------------------------------------------------------------------------------------------------------------------------------------------------------------------------------|

36  
37  
38  
39  
40  
41  
42  
43  
44

|                              |                                                                                                                                                                                                                                                            |                                                                                                                                                                          |
|------------------------------|------------------------------------------------------------------------------------------------------------------------------------------------------------------------------------------------------------------------------------------------------------|--------------------------------------------------------------------------------------------------------------------------------------------------------------------------|
| Quiet/silence / slowing down | I'm not in as much of a rush to get to the right answer. I'm more comfortable with the silence, with the space, with the level of certainty that comes with primary care, and understanding that I don't have to have the answer right this instant. [MD8] | I think silence is a big part of presence, and I think just taking a minute to notice, to get where the person is from, really how are you today. [Psychology professor] |
|------------------------------|------------------------------------------------------------------------------------------------------------------------------------------------------------------------------------------------------------------------------------------------------------|--------------------------------------------------------------------------------------------------------------------------------------------------------------------------|

---

### 45 *Management of the Physical Environment*

---

46  
47  
48  
49  
50  
51  
52  
53

|                                              |                                                                                                                                                                                                     |                                                                                                                                                                                         |
|----------------------------------------------|-----------------------------------------------------------------------------------------------------------------------------------------------------------------------------------------------------|-----------------------------------------------------------------------------------------------------------------------------------------------------------------------------------------|
| Occupying the same space as a client/patient | I certainly pull the chair up close to talk to people trying to find that right distance, not too close, but certainly not across the room. Just trying to be in that space with the patient. [MD1] | Presence is a felt sense that I have of ... being seated inside myself in my body and being present in the room, sitting in the room and aware of everything that's in the room. [LCSW] |
|----------------------------------------------|-----------------------------------------------------------------------------------------------------------------------------------------------------------------------------------------------------|-----------------------------------------------------------------------------------------------------------------------------------------------------------------------------------------|

54  
55  
56  
57  
58  
59  
60

Setting  
boundaries

I'll be very persistent [about staying on topic]. Like, 'Uh, no, we're not going there. We're staying here.' That's ...related to boundary setting ...trying to control things so that there can be connection, so that something can happen, so that there's time to actually engage...[MD5]

...Setting boundaries... [is] I hear you say ... 'here's what I'm going to do and here's what you're going to do. Is that okay with you?' Asking permission. [Recreational therapist]

Technology/  
managing  
competing  
priorities

And so, maybe part of presence is also letting them know, okay, I'm looking at the ER visit, because you're telling me about that. [MD3]

So you close the laptop and you get away from the table and you don't look at your notes and you connect. [Psychology professor]

# Reporting checklist for qualitative study.

Based on the SRQR guidelines.

## Instructions to authors

Complete this checklist by entering the page numbers from your manuscript where readers will find each of the items listed below.

Your article may not currently address all the items on the checklist. Please modify your text to include the missing information. If you are certain that an item does not apply, please write "n/a" and provide a short explanation.

Upload your completed checklist as an extra file when you submit to a journal.

In your methods section, say that you used the SRQR reporting guidelines, and cite them as:

O'Brien BC, Harris IB, Beckman TJ, Reed DA, Cook DA. Standards for reporting qualitative research: a synthesis of recommendations. *Acad Med.* 2014;89(9):1245-1251.

|                                            | Reporting Item                                                                                                                                                                                                                                 | Page Number |
|--------------------------------------------|------------------------------------------------------------------------------------------------------------------------------------------------------------------------------------------------------------------------------------------------|-------------|
|                                            | #1 Concise description of the nature and topic of the study identifying the study as qualitative or indicating the approach (e.g. ethnography, grounded theory) or data collection methods (e.g. interview, focus group) is recommended        | 1           |
|                                            | #2 Summary of the key elements of the study using the abstract format of the intended publication; typically includes background, purpose, methods, results and conclusions                                                                    | 4-5         |
| Problem formulation                        | #3 Description and significance of the problem / phenomenon studied: review of relevant theory and empirical work; problem statement                                                                                                           | 6           |
| Purpose or research question               | #4 Purpose of the study and specific objectives or questions                                                                                                                                                                                   | 6           |
| Qualitative approach and research paradigm | #5 Qualitative approach (e.g. ethnography, grounded theory, case study, phenomenology, narrative research) and guiding theory if appropriate; identifying the research paradigm (e.g. postpositivist, constructivist / interpretivist) is also | 6-7         |

recommended; rationale. The rationale should briefly discuss the justification for choosing that theory, approach, method or technique rather than other options available; the assumptions and limitations implicit in those choices and how those choices influence study conclusions and transferability. As appropriate the rationale for several items might be discussed together.

|    |                            |                                                                    |   |
|----|----------------------------|--------------------------------------------------------------------|---|
| 1  |                            |                                                                    |   |
| 2  |                            |                                                                    |   |
| 3  |                            |                                                                    |   |
| 4  |                            |                                                                    |   |
| 5  |                            |                                                                    |   |
| 6  |                            |                                                                    |   |
| 7  |                            |                                                                    |   |
| 8  |                            |                                                                    |   |
| 9  |                            |                                                                    |   |
| 10 | Researcher characteristics | #6                                                                 | 7 |
| 11 | and reflexivity            |                                                                    |   |
| 12 |                            | Researchers' characteristics that may influence the research,      |   |
| 13 |                            | including personal attributes, qualifications / experience,        |   |
| 14 |                            | relationship with participants, assumptions and / or               |   |
| 15 |                            | presuppositions; potential or actual interaction between           |   |
| 16 |                            | researchers' characteristics and the research questions,           |   |
| 17 |                            | approach, methods, results and / or transferability                |   |
| 18 |                            |                                                                    |   |
| 19 |                            |                                                                    |   |
| 20 | Context                    | #7                                                                 | 6 |
| 21 |                            | Setting / site and salient contextual factors; rationale           |   |
| 22 | Sampling strategy          | #8                                                                 | 6 |
| 23 |                            | How and why research participants, documents, or events were       |   |
| 24 |                            | selected; criteria for deciding when no further sampling was       |   |
| 25 |                            | necessary (e.g. sampling saturation); rationale                    |   |
| 26 |                            |                                                                    |   |
| 27 | Ethical issues pertaining  | #9                                                                 | 7 |
| 28 | to human subjects          |                                                                    |   |
| 29 |                            | Documentation of approval by an appropriate ethics review          |   |
| 30 |                            | board and participant consent, or explanation for lack thereof;    |   |
| 31 |                            | other confidentiality and data security issues                     |   |
| 32 |                            |                                                                    |   |
| 33 | Data collection methods    | #10                                                                | 7 |
| 34 |                            | Types of data collected; details of data collection procedures     |   |
| 35 |                            | including (as appropriate) start and stop dates of data collection |   |
| 36 |                            | and analysis, iterative process, triangulation of sources /        |   |
| 37 |                            | methods, and modification of procedures in response to             |   |
| 38 |                            | evolving study findings; rationale                                 |   |
| 39 |                            |                                                                    |   |
| 40 |                            |                                                                    |   |
| 41 | Data collection            | #11                                                                | 7 |
| 42 | instruments and            |                                                                    |   |
| 43 | technologies               |                                                                    |   |
| 44 |                            | Description of instruments (e.g. interview guides,                 |   |
| 45 |                            | questionnaires) and devices (e.g. audio recorders) used for data   |   |
| 46 |                            | collection; if / how the instruments(s) changed over the course    |   |
| 47 |                            | of the study                                                       |   |
| 48 | Units of study             | #12                                                                | 7 |
| 49 |                            | Number and relevant characteristics of participants, documents,    |   |
| 50 |                            | or events included in the study; level of participation (could be  |   |
| 51 |                            | reported in results)                                               |   |
| 52 |                            |                                                                    |   |
| 53 | Data processing            | #13                                                                | 7 |
| 54 |                            | Methods for processing data prior to and during analysis,          |   |
| 55 |                            | including transcription, data entry, data management and           |   |
| 56 |                            | security, verification of data integrity, data coding, and         |   |
| 57 |                            | anonymisation / deidentification of excerpts                       |   |
| 58 |                            |                                                                    |   |
| 59 |                            |                                                                    |   |
| 60 |                            |                                                                    |   |

|    |                                                                                              |     |                                                                                                                                                                                                                                                                                                          |            |
|----|----------------------------------------------------------------------------------------------|-----|----------------------------------------------------------------------------------------------------------------------------------------------------------------------------------------------------------------------------------------------------------------------------------------------------------|------------|
| 1  | Data analysis                                                                                | #14 | Process by which inferences, themes, etc. were identified and developed, including the researchers involved in data analysis; usually references a specific paradigm or approach; rationale                                                                                                              | 7          |
| 2  |                                                                                              |     |                                                                                                                                                                                                                                                                                                          |            |
| 3  |                                                                                              |     |                                                                                                                                                                                                                                                                                                          |            |
| 4  |                                                                                              |     |                                                                                                                                                                                                                                                                                                          |            |
| 5  |                                                                                              |     |                                                                                                                                                                                                                                                                                                          |            |
| 6  | Techniques to enhance trustworthiness                                                        | #15 | Techniques to enhance trustworthiness and credibility of data analysis (e.g. member checking, audit trail, triangulation); rationale                                                                                                                                                                     | 7          |
| 7  |                                                                                              |     |                                                                                                                                                                                                                                                                                                          |            |
| 8  |                                                                                              |     |                                                                                                                                                                                                                                                                                                          |            |
| 9  |                                                                                              |     |                                                                                                                                                                                                                                                                                                          |            |
| 10 |                                                                                              |     |                                                                                                                                                                                                                                                                                                          |            |
| 11 | Syntheses and interpretation                                                                 | #16 | Main findings (e.g. interpretations, inferences, and themes); might include development of a theory or model, or integration with prior research or theory                                                                                                                                               | 8-9        |
| 12 |                                                                                              |     |                                                                                                                                                                                                                                                                                                          |            |
| 13 |                                                                                              |     |                                                                                                                                                                                                                                                                                                          |            |
| 14 |                                                                                              |     |                                                                                                                                                                                                                                                                                                          |            |
| 15 |                                                                                              |     |                                                                                                                                                                                                                                                                                                          |            |
| 16 |                                                                                              |     |                                                                                                                                                                                                                                                                                                          |            |
| 17 | Links to empirical data                                                                      | #17 | Evidence (e.g. quotes, field notes, text excerpts, photographs) to substantiate analytic findings                                                                                                                                                                                                        | See note 1 |
| 18 |                                                                                              |     |                                                                                                                                                                                                                                                                                                          |            |
| 19 |                                                                                              |     |                                                                                                                                                                                                                                                                                                          |            |
| 20 |                                                                                              |     |                                                                                                                                                                                                                                                                                                          |            |
| 21 | Intergration with prior work, implications, transferability and contribution(s) to the field | #18 | Short summary of main findings; explanation of how findings and conclusions connect to, support, elaborate on, or challenge conclusions of earlier scholarship; discussion of scope of application / generalizability; identification of unique contributions(s) to scholarship in a discipline or field | 10         |
| 22 |                                                                                              |     |                                                                                                                                                                                                                                                                                                          |            |
| 23 |                                                                                              |     |                                                                                                                                                                                                                                                                                                          |            |
| 24 |                                                                                              |     |                                                                                                                                                                                                                                                                                                          |            |
| 25 |                                                                                              |     |                                                                                                                                                                                                                                                                                                          |            |
| 26 |                                                                                              |     |                                                                                                                                                                                                                                                                                                          |            |
| 27 |                                                                                              |     |                                                                                                                                                                                                                                                                                                          |            |
| 28 |                                                                                              |     |                                                                                                                                                                                                                                                                                                          |            |
| 29 | Limitations                                                                                  | #19 | Trustworthiness and limitations of findings                                                                                                                                                                                                                                                              | 11         |
| 30 |                                                                                              |     |                                                                                                                                                                                                                                                                                                          |            |
| 31 | Conflicts of interest                                                                        | #20 | Potential sources of influence of perceived influence on study conduct and conclusions; how these were managed                                                                                                                                                                                           | 12         |
| 32 |                                                                                              |     |                                                                                                                                                                                                                                                                                                          |            |
| 33 |                                                                                              |     |                                                                                                                                                                                                                                                                                                          |            |
| 34 |                                                                                              |     |                                                                                                                                                                                                                                                                                                          |            |
| 35 | Funding                                                                                      | #21 | Sources of funding and other support; role of funders in data collection, interpretation and reporting                                                                                                                                                                                                   | 12         |
| 36 |                                                                                              |     |                                                                                                                                                                                                                                                                                                          |            |
| 37 |                                                                                              |     |                                                                                                                                                                                                                                                                                                          |            |
| 38 |                                                                                              |     |                                                                                                                                                                                                                                                                                                          |            |
| 39 |                                                                                              |     |                                                                                                                                                                                                                                                                                                          |            |

## Author notes

### 1. 8-9, Table 3

The SRQR checklist is distributed with permission of Wolters Kluwer © 2014 by the Association of American Medical Colleges. This checklist was completed on 02. April 2019 using <https://www.goodreports.org/>, a tool made by the [EQUATOR Network](#) in collaboration with [Penelope.ai](#)



# BMJ Open

## What is Clinician Presence? A qualitative interview study comparing physician and non-physician insights about practices of human connection

|                                 |                                                                                                                                                                                                                                                                                                                                                                                                                                                              |
|---------------------------------|--------------------------------------------------------------------------------------------------------------------------------------------------------------------------------------------------------------------------------------------------------------------------------------------------------------------------------------------------------------------------------------------------------------------------------------------------------------|
| Journal:                        | <i>BMJ Open</i>                                                                                                                                                                                                                                                                                                                                                                                                                                              |
| Manuscript ID                   | bmjopen-2019-030831.R2                                                                                                                                                                                                                                                                                                                                                                                                                                       |
| Article Type:                   | Original research                                                                                                                                                                                                                                                                                                                                                                                                                                            |
| Date Submitted by the Author:   | 11-Oct-2019                                                                                                                                                                                                                                                                                                                                                                                                                                                  |
| Complete List of Authors:       | Brown-Johnson, Cati; Stanford University,<br>Schwartz, Rachel; Stanford University<br>Maitra, Amrapali; Stanford University<br>Haverfield, Marie; Stanford University<br>Tierney, Aaron; Stanford University<br>Shaw, Jonathan G; Stanford University<br>Zionts, Dani; Stanford University<br>Safaeinili, Nadia; Stanford University<br>Thadaney, Sonoo; Stanford University<br>Verghese, Abraham; Stanford University<br>Zulman, Donna; Stanford University |
| <b>Primary Subject Heading</b>: | Patient-centred medicine                                                                                                                                                                                                                                                                                                                                                                                                                                     |
| Secondary Subject Heading:      | Medical education and training, Health services research, General practice / Family practice, Communication, Qualitative research                                                                                                                                                                                                                                                                                                                            |
| Keywords:                       | physician-patient relationships, QUALITATIVE RESEARCH, burnout, physician presence, PRIMARY CARE, Physician-patient relationships, qualitative research, burnout, clinician presence, primary health care                                                                                                                                                                                                                                                    |
|                                 |                                                                                                                                                                                                                                                                                                                                                                                                                                                              |

SCHOLARONE™  
Manuscripts

1  
2  
3  
4  
5 What is Clinician Presence? A qualitative interview study comparing physician and non-  
6  
7 physician insights about practices of human connection  
8  
9

10  
11  
12 Authors: Cati G. Brown-Johnson, PhD, Rachel Schwartz, PhD, Amrapali Maitra, MD, PhD,  
13  
14 Marie C. Haverfield, PhD, Aaron A. Tierney, Jonathan G. Shaw, MD, Dani L. Zions, MPH,  
15  
16 Nadia Safaeinili, MPH, Sonoo Thadaney, MBA, Abraham Verghese, MD, Donna M. Zulman,  
17  
18 MD  
19  
20  
21  
22

23 Affiliations:

24  
25  
26 C.G. Brown-Johnson is a social science research scholar, Division of Primary Care & Population  
27  
28 Health, Stanford University School of Medicine, Stanford, CA  
29  
30  
31

32  
33 R. Schwartz is a Health Services Research Fellow at the Center for Innovation to Implementation  
34  
35 (Ci2i), VA Palo Alto Health Care System, Menlo Park, CA and a postdoctoral fellow at the  
36  
37 Stanford University Center for Health Policy and Center for Primary Care and Outcomes  
38  
39 Research  
40  
41  
42  
43

44 A. Maitra is a resident physician and clinical fellow in medicine at Brigham and Women's  
45  
46 Hospital, Harvard Medical School, Boston, MA  
47  
48  
49  
50

51 M.C. Haverfield is a postdoctoral scholar, Center for Innovation to Implementation (Ci2i), VA  
52  
53 Palo Alto Health Care System, Menlo Park, CA  
54  
55  
56  
57  
58  
59  
60

1  
2  
3 A.A. Tierney is research assistant, Division of Primary Care & Population Health, Stanford  
4  
5 University School of Medicine, Stanford, CA  
6  
7  
8  
9

10 J.G. Shaw is assistant professor, Division of Primary Care & Population Health, Stanford  
11  
12 University School of Medicine, Stanford, CA  
13  
14  
15

16  
17 D.L. Zions is a social science research associate, Division of Primary Care & Population Health,  
18  
19 Stanford University School of Medicine, Stanford, CA  
20  
21  
22

23  
24 N. Safaeinili is a social science research associate, Division of Primary Care & Population  
25  
26 Health, Stanford University School of Medicine, Stanford, CA  
27  
28  
29

30  
31 S. Thadaney is executive director, Presence and the Program in Bedside Medicine, Stanford  
32  
33 University School of Medicine, Stanford, CA  
34  
35  
36

37  
38 A. Verghese is professor, Presence and the Program in Bedside Medicine, Stanford University  
39  
40 School of Medicine, Stanford, CA  
41  
42  
43

44  
45 D. Zulman is associate professor, Division of Primary Care & Population Health, Stanford  
46  
47 University School of Medicine, Stanford, CA  
48  
49  
50

51  
52 Correspondence should be addressed to:  
53

54  
55 Cati Brown-Johnson  
56  
57  
58  
59  
60

1  
2  
3 Division of Primary Care and Population Health  
4

5  
6 Stanford University School of Medicine  
7

8  
9 Stanford MSOB, 1265 Welch Rd x216  
10

11  
12 Palo Alto, CA 94305  
13

14  
15 Telephone: (650) 736-3394  
16

17  
18 Email: catibj@stanford.edu  
19

20  
21  
22 Please note:  
23

24  
25  
26 Word count: 1246  
27

28  
29  
30 Numbers of tables: 2  
31

32  
33  
34  
35 Keywords: Physician-patient relationships, qualitative research, burnout, clinician presence,  
36  
37 primary health care  
38  
39  
40  
41  
42  
43  
44  
45  
46  
47  
48  
49  
50  
51  
52  
53  
54  
55  
56  
57  
58  
59  
60

## Abstract

Objective: We sought to investigate the concept and practices of “clinician presence,” exploring how physicians and professionals create connection, engage in interpersonal interaction, and build trust with individuals across different circumstances and contexts.

Design: In 2017-18, we conducted qualitative semi-structured interviews with 10 physicians and 30 non-medical professionals from the fields of protective services, business, management, education, art/design/entertainment, social services, and legal/personal services.

Setting: Physicians were recruited from primary care clinics in an academic medical center, a Veterans Affairs clinic, and a federally-qualified health center.

Participants: Participants were 55% male and 45% female; 40% were non-white.

Results: Qualitative analyses yielded a definition of presence as *a purposeful practice of awareness, focus, and attention with the intent to understand and connect with individuals/patients*. For both medical and non-medical professionals, creating presence requires managing and considering time and environmental factors; for physicians in particular, this includes managing and integrating technology. Listening was described as central to creating the state of being present. Within a clinic, presence might manifest as a physician listening without interrupting, focusing intentionally on the patient, taking brief re-centering breaks throughout a clinic day; and informing patients when attention must be redirected to administrative or technological demands.

1  
2  
3  
4  
5 Conclusions: Clinician presence involves learning to step back, pause, and be prepared to receive  
6 a patient's story. Building on strategies from physicians and non-medical professionals, clinician  
7 presence is best enacted through purposeful intention to connect, conscious navigation of time,  
8 and proactive management of technology and the environment in order to focus attention on the  
9 patient. Everyday practice or ritual supporting these strategies could support physician self-care  
10 as well as physician-patient connection.  
11  
12  
13  
14  
15  
16  
17  
18  
19  
20

### 21 **Strengths and limitations of this study**

- 22 • Strengths of this study include its novelty; this is the first study to use human-centered  
23 design principles and methods to systematically define clinician *presence*.  
24
- 25 • This study uses interviews with physicians and non-physician intentionally to broaden  
26 potential options and strategies for creating presence with patients beyond those typically  
27 considered in strictly medical settings.  
28
- 29 • Limitations included a modest dataset (n=40), which is acceptable for a qualitative  
30 investigation, and which adequately addressed thematic saturation and coherence.  
31  
32  
33  
34  
35  
36  
37  
38  
39  
40  
41  
42  
43  
44  
45  
46  
47  
48  
49  
50  
51  
52  
53  
54  
55  
56  
57  
58  
59  
60

## Introduction

The practice of medicine today is challenging for a number of reasons, including data-entry requirements, rapid patient turnover, inadequate reimbursement, lack of administrative support, competing demands, litigious environment, and increased complexity of patients. The demands of practicing modern medicine present many barriers to physicians' ability to deliver humanistic, patient-centered care and uphold the ideals of medicine.<sup>1</sup>

Patient experience suffers in an overburdened healthcare system, and meanwhile the rates of physician burnout have reached alarming levels. Almost half of physicians in the US show evidence of burnout.<sup>2,3</sup> Burnout is historically related to emotional exhaustion,<sup>4</sup> but for some clinicians may manifest as depersonalization and disengagement.<sup>5</sup>

While it is widely understood that system-level interventions are needed to address burnout, interventions that facilitate clinician engagement and mindfulness can also be helpful.<sup>6</sup> At the individual level, successfully being more “present” may make space for physicians to reconnect with the personal rewards of clinical practice, even if little else changes.

Working concepts of “presence” incorporate practice-oriented insights from across clinical care and research—including physician burnout,<sup>2</sup> patient-physician communication,<sup>7</sup> and patient-centered care<sup>8</sup>—and diverse other fields, ranging from business to education. However, there is little literature on “clinician presence.” Other studies addressing this concept have been focused

1  
2  
3 in niche areas such as psychology/psychotherapy,<sup>9</sup> palliative care,<sup>10</sup> or family and caregiver  
4 healthcare experience.<sup>11</sup> These few studies have presented clinician presence as a state of  
5 mindfulness,<sup>9</sup> “compassionate silence” originating from within a contemplative practice,<sup>10</sup> or a  
6 patient-clinician “shared presence” that relies on engagement of both parties.<sup>11</sup>  
7  
8  
9  
10  
11  
12

13  
14 Our research around defining presence seeks to outline the important elements of clinician  
15 presence, and to specifically decouple it from patient-clinician communication, which is bi-  
16 directional. Clinician presence in our view can be enacted by physicians, with or without active  
17 patient reception. Although the term is commonly used, our research question centered on  
18 identifying a universal definition for clinician presence using qualitative data from interviews  
19 with primary care physicians and non-medical professionals from diverse fields in which human  
20 connection is central.  
21  
22  
23  
24  
25  
26  
27  
28  
29  
30  
31  
32

## 33 **Methods**

34  
35  
36  
37

38 We conducted a qualitative study of semi-structured interviews in 2017-18 with physicians  
39 (n=10) and non-medical professionals (n=30) in California. Team members trained in qualitative  
40 methods (CBJ, RS, DLZ, and NS) interviewed 10 internal medicine and family medicine  
41 physicians practicing in 3 primary care clinics at an academic medical center, a Veterans Affairs  
42 facility, and a federally-qualified health center serving primarily Spanish-speaking immigrants.  
43  
44  
45  
46  
47  
48  
49  
50

51 Considering the scale of barriers that medicine is facing, from rising costs to physician shortages,  
52 some have called for researchers and planners to look for solutions outside of medicine. One  
53 such approach is human-centered design, which leverages insights from stakeholders at every  
54  
55  
56  
57  
58  
59  
60



1  
2  
3 level of design practice, and has been specifically called for in terms of building resilience in  
4  
5 medicine.<sup>12</sup> We employed a human-centered design approach that leveraged analogous  
6  
7 inspiration, a strategy that has been used by engineers when there is little precedent: analogous  
8  
9 domains must be examined as a starting point from which possible context-dependent solutions  
10  
11 can be developed.<sup>13</sup> Since little has been systematically documented about clinician presence in  
12  
13 medicine, we intentionally wanted to reach beyond medicine to gather insights from analogous  
14  
15 domains. In general, human-centered design and analogous inspiration gives us the opportunity  
16  
17 to learn for elegant solutions that may already exist, but have not yet been utilized in the medical  
18  
19 setting.  
20  
21  
22  
23  
24  
25

26 We used convenience sampling to interview 30 individuals systematically representing a variety  
27  
28 of non-medical professions from 11 of the 25 occupation groups listed by the US Bureau of  
29  
30 Labor Statistics (Table 1). Using the concept of analogous inspiration, we intentionally targeted  
31  
32 professionals whose work involves fostering effective connections with individuals, often under  
33  
34 stressful circumstances. We used a convenience sampling technique to identify participants, and  
35  
36 intentionally recruited from diverse fields to create a sample representative of the range of  
37  
38 careers.  
39  
40  
41  
42  
43

44 Overall, participants were balanced in terms of gender (55% male, 45% female), and represented  
45  
46 a diversity of race/ethnicities while skewing white/Caucasian (60%) (Table 2). Ethical approval  
47  
48 was exempt for anonymous interviews with non-physicians by the Stanford IRB protocol 43314,  
49  
50 September 27, 2017; and approval was granted for de-identified interviews with physicians as  
51  
52 part of the Presence study by the Stanford IRB, protocol 42397; October 26, 2017. Interview  
53  
54 recordings and transcripts were stored in PHI and HIPAA-compliant secure files, and were only  
55  
56  
57  
58  
59

1  
2  
3 available to research staff. Transcripts for clinicians were deidentified, retaining only  
4  
5 information about role (eg. MD 1). Files were anonymous in the case of non-medical  
6  
7 professionals, where signed informed consent was waived due to IRB exemption (#43314).  
8

9  
10 Physician participants signed informed consent in accordance with IRB #42397.  
11  
12

13  
14 Interviews explored the concept of “presence” with questions about creating connection, being  
15  
16 more present, building trust, adjusting strategies for different people, and navigating the  
17  
18 environment during interactions with clients and patients (see Table 3). All interviews were  
19  
20 recorded and transcribed, and we used the constant comparative method to code transcripts,  
21  
22 meeting frequently as a team to discuss and workshop qualitative themes.<sup>14</sup> Interview excerpts  
23  
24 relevant to presence were independently analyzed by two qualitative researchers (AM – MD and  
25  
26 PhD in Anthropology; CBJ – PhD in Linguistics) to generate core elements of presence. These  
27  
28 elements were iteratively refined into a framework using inductive coding, which enabled us to  
29  
30 define elements of presence as they emerged from the data. Since there was not an established  
31  
32 definition of presence prior to this work, we did not have preset codes. We discussed the  
33  
34 definition and coding as a full research team (12 individuals with backgrounds in medicine,  
35  
36 implementation science, health services research, physician wellness, health communication, and  
37  
38 linguistics) weekly over the course of a month. Detailed meeting notes were kept by two project  
39  
40 managers, and we referred back to these meeting notes from session to session. To address  
41  
42 biases, we debated discrepancies, but also recognized and listened to minority opinions.  
43  
44

45  
46 Research suggests that this kind of disagreement and welcoming of minority viewpoints results  
47  
48 in better-quality coding and decision-making.<sup>15</sup> A working definition of presence, plus the major  
49  
50 themes supporting this definition, were presented to our advisors and refined during discussions  
51  
52 with the team and advisors. This resulted in: 1) a shared definition of presence; 2) a framework  
53  
54  
55  
56  
57  
58  
59

1  
2  
3 with several major themes supporting this definition; and 3) identification of cross-professional  
4 strategies for attaining presence. Data generated and analyzed as part of this research are not  
5  
6 publicly posted due to potential opportunity to identify participants. However, data are available  
7  
8 from the corresponding author on reasonable request. Protocols are also available upon request.  
9  
10  
11  
12  
13

#### 14 Patient and Public Involvement

15  
16  
17  
18 Limited public involvement in the design and analysis of this research was elicited via research-  
19 in-progress presentations to the Presence Center at Stanford University School of Medicine.  
20  
21  
22

23 Patient input was not directly requested.  
24  
25  
26  
27

## 28 Results

29  
30  
31  
32 Qualitative analyses yielded a definition for clinician presence as, *a purposeful practice of*  
33 *awareness, focus, and attention with the intent to understand and connect with*  
34 *individuals/patients.* Our framework focused on activities involved in creating presence:  
35  
36 intentional connection, being aware of time, and managing the physical environment (Table 4).  
37  
38  
39  
40  
41  
42  
43

### 44 Presence requires purposeful intention to connect.

45  
46  
47  
48 Several interviewees noted that connection is created through “attention,” “focus,” and “listening  
49 just to understand.” One physician described presence as “intense connected moment[s]” during  
50 the clinical interview, where “[you are] trying to understand [a patient’s] level of suffering [and]  
51 the significance of their story.” An enforcement agent stated that connection is “the goal of  
52  
53  
54  
55  
56  
57  
58  
59  
60

1  
2  
3 presence”; a chaplain defined presence as a state of “[not being] alone to each other.” Presence  
4  
5 was also described as the absence or opposite of distraction. A journalist reflected that not paying  
6  
7 attention could indicate “this person is not really interested...in me.”  
8  
9

10  
11  
12 Our definition of presence as “purposeful” practices intentionally includes both *deliberate*  
13  
14 practices – practices that you intentionally choose to do – and also doing practices *for a purpose*,  
15  
16 with the goal of achieving specific results. Deliberate practices and goals overlapped, informing  
17  
18 our choice of the word “purposeful,” and included: making an agenda “so we’re clear”  
19  
20 (physician); making a connection (high school health educator); determining how truthful people  
21  
22 are being (enforcement agent); identifying skills and resources people need to get tasks done  
23  
24 (software company director); listening to understand, not to develop a response (hospice  
25  
26 volunteer); trying to empower patients (physician); supporting the feeling of making a difference  
27  
28 (physician); and engendering trust through participant empowerment (documentary filmmaker).  
29  
30 We see in our data that presence is central to the goals of patient care, including connecting and  
31  
32 listening, and also to the care of the humanity of the clinician, promoting resiliency for them  
33  
34 through feeling that they make a difference.  
35  
36  
37  
38  
39  
40  
41

42 Interviewees described removing distractions and being prepared as key strategies to achieving  
43  
44 purposeful intention. Some mentioned removing both literal and figurative distractions. A  
45  
46 restorative justice lawyer described a personal ritual of brushing off external or intruding  
47  
48 thoughts and feelings between encounters to be more present, and repeating: “Now. Here. This.”  
49  
50  
51 Several physicians described the value of arriving early to review charts and plan, in order to  
52  
53 enter into visits feeling prepared.  
54  
55  
56  
57  
58  
59  
60

### **Presence requires conscious navigation of time.**

Presence was described as something temporal and tangible, happening during a specific time, and requiring protective boundaries. Time was referenced repeatedly, for example “taking a minute to notice” (health promoter). Echoing its root in the concept of being in the present, presence was defined as not thinking ahead but instead returning to the current moment. An enforcement agent also referenced presence as being aware “in real time.”

Strategies related to presence and time included prioritizing brief quiet time for reflective “re-centering” breaks that physicians and professionals mentioned needing between patients/clients.

A physician also suggested “not filling every moment” of the day with technological distractions to allow more time for presence. Some physicians bemoaned the lack of time for self-reflection: “I don't go home saying, ‘That was a great day,’ I go home saying, ‘I've got all this other work to do.’” By contrast, a teacher valued the “bit of time to debrief” with colleagues as valuable because it helped them process and be ready for the next day.

Clinicians acknowledged that “time with the patient [is] the key...An offhand comment when you're talking about shoulder pain could lead you down to more chest pain.” In addition to being able to use time to explore medical content, physicians reported needing more time “to keep track of the growing data set” generated by the electronic health record (EHR).

### **Presence requires awareness of the physical environment.**

1  
2  
3 Presence was described in terms of its physical qualities. This included concrete factors such as  
4 positioning and spacing (“being physically there”), and also more abstract physical sensations:  
5  
6 “you feel it when the temperature changes in the room.” All interviewees described the pull of  
7  
8 competing priorities, with physicians particularly highlighting the challenge that administrative  
9  
10 demands and the EHR pose for presence, particularly because some clinicians expressed that it is  
11  
12 “rude for somebody to look at a screen and not look at the person in front of them.”  
13  
14  
15

16  
17  
18 Interviewees used space as a metaphor. In addition to referring to the literal physical  
19  
20 environment, the use of “space” also referenced the emotional and relational environment.  
21  
22 Discussion of space was both literal “the sound, the seats, the space, the rooms set up in a circle,”  
23  
24 and metaphorical “presence allows the space for the unknown and clinicians aren’t comfortable  
25  
26 with the unknown.” Participants (physician, recreational therapist, design researcher, health  
27  
28 promotor) often equated presence with space, as in “holding space,” or “letting enough space in.”  
29  
30  
31  
32  
33

34  
35 Strategies related to presence and space emphasized that, as with other physical spaces, presence  
36  
37 requires boundaries. Participants created presence by determining who would be in the room and  
38  
39 setting boundaries for how much personal information to share. To combat the distancing effects  
40  
41 of technology, physicians described putting away phones during clinic visits and avoiding email.  
42  
43 In addition, some physicians discussed strategies that preserved connection with patients during  
44  
45 technology use: “presence is also letting them know... [you’re] looking something up [in the  
46  
47 health record].”  
48  
49  
50

51  
52  
53 Physicians also utilized up-front expectation setting and help from team-members to support  
54  
55 boundaries on time. For instance, physicians would communicate from the start of the visit with  
56  
57  
58  
59

1  
2  
3 patients about boundaries of time, for example for the patient who arrived late: “[it’s] gonna be a  
4 short visit.” However, physicians were reluctant to interrupt patients on account of time, even if  
5 the visit was running over. In team-based practices, staff would also support boundaries around  
6 time by establishing visit length expectations during the rooming process, and knocking/entering  
7 the clinic room to communicate when a visit had gone too long.  
8  
9  
10  
11  
12  
13  
14  
15  
16

## 17 **Discussion**

18  
19  
20  
21 In this study of physicians and non-medical professionals whose jobs involve human connection,  
22 we found that presence is a universal concept that involves intentionality, focus, and attention to  
23 time and the physical environment. A growing body of work has explored presence in the  
24 context of healthcare system/intervention design,<sup>16–19</sup> and has focused on clinical conditions,  
25 actions, or training to make presence possible. To our knowledge, however, this is the first study  
26 to systematically generate a definition for presence, which may help guide research and  
27 interventions that leverage insights from within and outside the field of medicine.  
28  
29  
30  
31  
32  
33  
34  
35  
36  
37  
38  
39

### 40 **Presence vis-a-vis connection, empathy, and mindfulness**

41  
42  
43  
44 Presence rightly overlaps with other core areas of patient-clinician interactions, such as  
45 connection, empathy, and emotions (both those of the patient and the physician). Extensive work  
46 in the realm of relational communication can be leveraged to support presence and shed light on  
47 how clinician presence might be achieved, for instance by attending to patient stories, avoiding  
48 interruptions, using silence and reflective listening, setting agendas, and harnessing non-verbal  
49 communication skills such as eye contact and leaning in. In this vein, interventions building  
50  
51  
52  
53  
54  
55  
56  
57  
58  
59  
60

1  
2  
3 communication skills with emphasis on presence-like relational communication have been  
4  
5 associated with reducing burnout.<sup>7</sup>  
6  
7  
8  
9

10 Furthermore, research in the interface between emotional awareness/empathy and presence could  
11 enrich both concepts. Empathy and emotional awareness exhibited by clinicians builds trust,<sup>20</sup>  
12 but the documented “emotional labor” of empathy in clinical care is substantial.<sup>21</sup> The support  
13 that physicians need both in managing responses to patient emotions and regulating their own  
14 emotional wellbeing could be addressed through clinician presence. Presence may consist of a  
15 set of behaviors, skills, and rituals allowing clinicians to better care for patients in distress. It  
16 may also support physicians in allowing for structured rituals, such as a few deep breaths before  
17 entering into patient rooms, that are known to support regulation of emotional experience by  
18 changing neurological and physical responses in the body.<sup>22</sup>  
19  
20  
21  
22  
23  
24  
25  
26  
27  
28  
29  
30

31  
32 Defining clinical presence gives medicine the conceptual language to examine unexplored  
33 elements of patient-clinician connection that not only enhance patient care, but also enrich  
34 clinician experience of their role as healers. Today’s technology-saturated clinic environment is  
35 driving demand for interventions that foster human connection; an intervention focused on  
36 presence is a natural next step to address human disconnection in busy clinics.  
37  
38  
39  
40  
41  
42  
43  
44  
45

46 Our interest in presence is motivated by the need to synthesize approaches from connection,  
47 communication, and partnership in the context of the clinic visit. We are also driven by the  
48 conviction that while fundamentals of communication, emotional awareness, or even perfected  
49 clinic flow are indeed steps towards achieving better patient outcomes, there is more to healing  
50 than any individual practice in these domains. Our framework for presence may facilitate  
51  
52  
53  
54  
55  
56  
57  
58  
59  
60



1  
2  
3 continued conversation about the role of physicians as scientists, detectives, empaths, and  
4  
5 healers.  
6  
7  
8  
9

### 10 **What could Presence look like?**

11  
12  
13

14 The features of presence lend themselves to specific practices that warrant further exploration,  
15 particularly in the areas of listening/silence, contextual awareness, and mindfulness. Presence  
16 involves learning to step back, pause, suspend expectations, and receive and connect with  
17 someone's story. Physicians interrupt their patients early and often<sup>23</sup>— an emphasis on listening  
18 as a prerequisite for presence opens conceptual and curricular space for teaching not only how to  
19 communicate, but when to stay silent.  
20  
21  
22  
23  
24  
25  
26  
27  
28  
29

30 Presence also lies at the juncture of interactions within clinical spaces; respondents described  
31 that it hangs in the air, is felt as a physical quality, or emanates between two people whose goals  
32 are aligned. Because presence is influenced by contextual factors for many professionals,  
33 teaching physicians to consider their physical environment could help preserve and channel  
34 connections. Specific approaches from the literature include sharing the screen so that the EHR  
35 is fully integrated into the visit, providing panel management support or scribe services,  
36 leveraging technical solutions to help support clinical decision-making, and maximizing the  
37 efficiency of the EHR.<sup>24,25</sup>  
38  
39  
40  
41  
42  
43  
44  
45  
46  
47  
48  
49

50 Looking ahead as the United States population ages, best practices for communication and  
51 connection will need to be expanded beyond the traditional patient-clinician dyad. Exploring  
52 presence may help us address the integration of caregivers, friends, and family into clinic visits  
53  
54  
55  
56  
57  
58  
59  
60

1  
2  
3 and relationships with clinicians. Finally, mindfulness may be an important component of  
4  
5 presence in training and clinical interactions, where even very minimal levels of effort (<5  
6  
7 minutes daily) may demonstrate benefit.  
8  
9

## 10 11 12 **Limitations** 13 14 15

16 Several limitations warrant discussion. First, study findings were derived from a small sample of  
17  
18 physicians and non-medical professionals. Nevertheless, we found that we reached thematic  
19  
20 saturation and coherence with 40 participants. Second, the study was limited to the perspective of  
21  
22 primary care clinicians and other professionals. Future efforts should evaluate the impact of  
23  
24 presence on patients, particularly since research has documented that physicians often  
25  
26 overestimate their ability to communicate effectively.<sup>26</sup> In addition, the study's focus on  
27  
28 individual practices to achieve presence has the potential to obscure the critical need for system-  
29  
30 based interventions that address time pressure and technology intrusions. To be clear, while our  
31  
32 findings suggest that presence is a central and important part of high-quality care that can  
33  
34 support wellness for both patients and clinicians, the full onus of system change should not be  
35  
36 placed on physicians. Misplacing the burden of responsibility solely on individual physicians  
37  
38 without addressing system-level issues could in fact have unintended consequences of increasing  
39  
40 expectations without adding support, which has been linked to increased burnout.<sup>27</sup>  
41  
42  
43  
44  
45  
46  
47

## 48 **Conclusion** 49

50 In conclusion, human connection is central to clinical care; while challenging to cultivate, this  
51  
52 connection offers some of the greatest rewards for practicing physicians. Insights from  
53  
54 physicians and non-medical professionals suggest that clinician presence may be achieved  
55  
56  
57  
58  
59  
60

1  
2  
3 through purposeful intention to connect, conscious navigation of time, and proactive  
4 management of technology and the environment in order to focus attention on the patient.  
5  
6 Adopting intentional practices to support presence may make physicians more receptive to  
7  
8 patient stories and facilitate meaningful exchanges that are critical to accurate diagnosis, clinical  
9  
10 decision-making, and therapeutic interactions for both patients and physicians.  
11  
12  
13  
14  
15  
16  
17  
18  
19  
20  
21  
22  
23  
24  
25  
26  
27  
28  
29  
30  
31  
32  
33  
34  
35  
36  
37  
38  
39  
40  
41  
42  
43  
44  
45  
46  
47  
48  
49  
50  
51  
52  
53  
54  
55  
56  
57  
58  
59  
60

1  
2  
3 Acknowledgments: None  
4  
5

6 Funding/Support: This study was supported by a grant from the Gordon and Betty Moore  
7 Foundation (#6382). RS and MCH were supported by a VA Office of Academic Affairs  
8 Advanced Fellowship in Health Services Research. The views expressed herein are those of the  
9 authors and do not necessarily reflect the views of the Department of Veterans Affairs.  
10  
11  
12  
13  
14  
15

16  
17  
18 Conflicts of Interest:  
19

20 Dr. Cati Brown-Johnson reports grants from the Gordon and Betty Moore Foundation (#6382),  
21 during the conduct of the study.  
22  
23

24 Dr. Rachel Schwartz reports grants from the Gordon and Betty Moore Foundation (#6382) and  
25 VA Office of Academic Affairs Advanced Fellowship, during the conduct of the study.  
26  
27

28 Dr. Amrapali Maitra has nothing to disclose.  
29  
30

31 Dr. Marie Haverfield reports grants from the Gordon and Betty Moore Foundation (#6382) and  
32 VA Office of Academic Affairs Advanced Fellowship, during the conduct of the study.  
33  
34

35 Mr. Aaron Tierney reports grants from the Gordon and Betty Moore Foundation (#6382), during  
36 the conduct of the study.  
37  
38

39 Dr. Jonathan Shaw reports grants from the Gordon and Betty Moore Foundation (#6382), during  
40 the conduct of the study.  
41  
42

43 Ms. Dani Zionts reports grants from the Gordon and Betty Moore Foundation (#6382), during  
44 the conduct of the study.  
45  
46

47 Ms. Nadia Safaeinili reports grants from the Gordon and Betty Moore Foundation (#6382),  
48 during the conduct of the study.  
49  
50  
51  
52  
53

1  
2  
3 Ms. Sonoo Thadaney reports grants from the Gordon and Betty Moore Foundation (#6382),  
4  
5 during the conduct of the study.  
6

7  
8 Dr. Abraham Verghese reports grants from the Gordon and Betty Moore Foundation (#6382),  
9  
10 during the conduct of the study.  
11

12 Dr. Donna Zulman reports grants from the Gordon and Betty Moore Foundation (#6382), during  
13  
14 the conduct of the study.  
15

16  
17  
18  
19 Ethical approval: Ethical approval has been granted for this study by the Stanford IRB, protocol  
20  
21 42397; October 26, 2017.  
22  
23

24  
25  
26 Disclaimer: None.  
27

28  
29  
30 Previous presentations: None.  
31

32  
33  
34 Authors' contributions  
35

36  
37  
38 CBJ was involved in data collection and analysis. She also was the primary author of the  
39  
40 manuscript.  
41

42  
43  
44  
45 RS was involved in data collection and analysis. She also was a major contributor to writing the  
46  
47 manuscript.  
48

49  
50  
51 AM was involved in data collection and analysis. She also was a primary contributor to the  
52  
53 manuscript.  
54  
55

1  
2  
3 MCH was involved in data collection and analysis. She also contributed significant edits to the  
4  
5 manuscript.  
6  
7  
8

9  
10 AT was involved in data collection and analysis. He also contributed significant edits to the  
11  
12 manuscript.  
13  
14  
15

16 JGS was involved in research design, data collection and also contributed significant edits to the  
17  
18 manuscript.  
19  
20  
21  
22

23 DLZ was involved in data collection and analysis. She also contributed significant edits to the  
24  
25 manuscript.  
26  
27  
28

29 NS was involved in data collection and analysis. She also contributed significant edits to the  
30  
31 manuscript.  
32  
33  
34  
35

36 ST was involved in research design and also contributed significant edits to the manuscript.  
37  
38  
39

40 AV was involved in research design and also contributed significant edits to the manuscript.  
41  
42  
43

44 DMZ was involved in research design and data collection, and also contributed significant edits  
45  
46 to the manuscript.  
47  
48  
49

50  
51 All authors read and approved the final manuscript.  
52  
53  
54  
55  
56  
57  
58  
59  
60

1  
2  
3  
4  
5  
6  
7 Data Availability:  
8  
9

10  
11 Data generated and analyzed as part of this research are not publicly posted due to potential  
12 opportunity to identify participants. However, data are available from the corresponding author  
13 on reasonable request. Protocols are also available upon request.  
14  
15  
16  
17  
18  
19  
20  
21  
22  
23  
24  
25  
26  
27  
28  
29  
30  
31  
32  
33  
34  
35  
36  
37  
38  
39  
40  
41  
42  
43  
44  
45  
46  
47  
48  
49  
50  
51  
52  
53  
54  
55  
56  
57  
58  
59  
60

## References

1. Rosenthal DI, Verghese A. Meaning and the nature of physicians' work. *N Engl J Med*. 2016;375(19):1813-1815. doi:10.1056/NEJMp1609055
2. Shanafelt TD, Boone S, Tan L, et al. Burnout and Satisfaction With Work-Life Balance Among US Physicians Relative to the General US Population. *Arch Intern Med*. 2012;172(18):1377. doi:10.1001/archinternmed.2012.3199
3. Shanafelt TD, West CP, Sinsky C, et al. Changes in Burnout and Satisfaction With Work-Life Integration in Physicians and the General US Working Population Between 2011 and 2017. *Mayo Clin Proc*. 2019;0(0). doi:10.1016/j.mayocp.2018.10.023
4. Freudenberger HJ. Staff Burn-Out. *J Soc Issues*. 1974;30(1):159-165. doi:10.1111/j.1540-4560.1974.tb00706.x
5. Leiter MP, Maslach C. Latent burnout profiles: A new approach to understanding the burnout experience. *Burn Res*. 2016;3(4):89-100. doi:10.1016/J.BURN.2016.09.001
6. Panagioti M, Panagopoulou E, Bower P, et al. Controlled Interventions to Reduce Burnout in Physicians. *JAMA Intern Med*. 2017;177(2):195. doi:10.1001/jamainternmed.2016.7674
7. Boissy A, Windover AK, Bokar D, et al. Communication Skills Training for Physicians Improves Patient Satisfaction. *J Gen Intern Med*. 2016;31(7):755-761.



- 1  
2  
3 doi:10.1007/s11606-016-3597-2  
4  
5  
6  
7  
8 8. Weissmann PF, Branch WT, Gracey CF, Haidet P, Frankel RM. Role Modeling  
9  
10 Humanistic Behavior: Learning Bedside Manner from the Experts. *Acad Med*.  
11  
12 2006;81(7):661-667. doi:10.1097/01.ACM.0000232423.81299.fe  
13  
14  
15  
16 9. Childs D. Mindfulness and the psychology of presence. *Psychol Psychother Theory, Res*  
17  
18 *Pract*. 2007;80(3):367-376. doi:10.1348/147608306X162600  
19  
20  
21  
22 10. Back AL, Bauer-Wu SM, Rushton CH, Halifax J. Compassionate Silence in the Patient–  
23  
24 Clinician Encounter: A Contemplative Approach. *J Palliat Med*. 2009;12(12):1113-1117.  
25  
26 doi:10.1089/jpm.2009.0175  
27  
28  
29  
30  
31 11. Marchand L. Shared presence: The heart of the therapeutic relationship. *Fam Syst Heal*.  
32  
33 2015;33(3):283-284. doi:10.1037/fsh0000154  
34  
35  
36  
37  
38 12. Searl MM, Borgi L, Chemali Z. It is time to talk about people: a human-centered  
39  
40 healthcare system. *Heal Res Policy Syst*. 2010;8(1):35. doi:10.1186/1478-4505-8-35  
41  
42  
43  
44  
45 13. Horsky J, Zhang J, Patel VL. To err is not entirely human: Complex technology and user  
46  
47 cognition. *J Biomed Inform*. 2005;38:264-266. doi:10.1016/j.jbi.2005.05.002  
48  
49  
50  
51 14. Glaser BG. The Constant Comparative Method of Qualitative Analysis. *Soc Probl*.  
52  
53 1965;12(4):436-445. doi:10.2307/798843  
54  
55  
56  
57  
58  
59  
60

- 1  
2  
3 15. Miller CE. The social psychological effects of group decision rules. In: Paulus P, ed.  
4  
5 *Psychology of Group Influence*. 2nd ed. Hillsdale, NJ: Erlbaum; 1989:327–355.  
6  
7  
8  
9  
10 16. Frankel R, Altschuler A, George S, et al. Effects of exam-room computing on clinician-  
11 patient communication: A longitudinal qualitative study. *J Gen Intern Med*. 2005.  
12  
13 doi:10.1111/j.1525-1497.2005.0163.x  
14  
15  
16  
17  
18 17. Sabo BM. Compassionate presence: The meaning of hematopoietic stem cell transplant  
19 nursing. *Eur J Oncol Nurs*. 2011;15(2):103-111. doi:10.1016/J.EJON.2010.06.006  
20  
21  
22  
23  
24  
25 18. Beer JM, Takayama L. Mobile remote presence systems for older adults. In: *Proceedings*  
26 *of the 6th International Conference on Human-Robot Interaction - HRI '11*. New York,  
27 New York, USA: ACM Press; 2011:19. doi:10.1145/1957656.1957665  
28  
29  
30  
31  
32  
33  
34 19. Lee BM, Curlin FA, Choi PJ. Documenting presence: A descriptive study of chaplain  
35 notes in the intensive care unit. *Palliat Support Care*. 2017;15(02):190-196.  
36  
37 doi:10.1017/S1478951516000407  
38  
39  
40  
41  
42  
43 20. Spiro HM (Howard M, Yale University. School of Medicine. *Empathy and the Practice of*  
44 *Medicine : Beyond Pills and the Scalpel*. Yale University Press; 1993.  
45  
46 <https://yalebooks.yale.edu/book/9780300058406/empathy-and-practice-medicine>.  
47  
48  
49 Accessed August 15, 2019.  
50  
51  
52  
53  
54 21. Kerasidou A, Horn R. Making space for empathy: supporting doctors in the emotional  
55  
56  
57  
58  
59  
60

- 1  
2  
3 labour of clinical care. *BMC Med Ethics*. 2016;17(1):8. doi:10.1186/s12910-016-0091-7  
4  
5  
6  
7  
8 22. Cheng KS, Han RPS, Lee PF. Neurophysiological study on the effect of various short  
9  
10 durations of deep breathing: A randomized controlled trial. *Respir Physiol Neurobiol*.  
11  
12 2018;249:23-31. doi:10.1016/J.RESP.2017.12.008  
13  
14  
15  
16 23. Marvel MK, Epstein RM, Flowers K, Beckman HB. Soliciting the patient's agenda: have  
17  
18 we improved? *JAMA*. 1999;281(3):283-287.  
19  
20 <http://www.ncbi.nlm.nih.gov/pubmed/9918487>. Accessed July 17, 2018.  
21  
22  
23  
24  
25 24. Israni ST, Verghese A. Humanizing Artificial Intelligence. *JAMA*. 2019;321(1):29.  
26  
27 doi:10.1001/jama.2018.19398  
28  
29  
30  
31  
32 25. Verghese A, Shah NH, Harrington RA. What This Computer Needs Is a Physician. *JAMA*.  
33  
34 2018;319(1):19. doi:10.1001/jama.2017.19198  
35  
36  
37  
38  
39 26. Ha JF, Longnecker N. Doctor-patient communication: A review. *Ochsner J*.  
40  
41 2010;10(1):38-43. doi:10.1043/toj-09-0040.1  
42  
43  
44  
45 27. Sinsky CA, Willard-Grace R, Schutzbank AM, Sinsky TA, Margolius D, Bodenheimer T.  
46  
47 In search of joy in practice: a report of 23 high-functioning primary care practices. *Ann*  
48  
49 *Fam Med*. 2013;11(3):272-278. doi:10.1370/afm.1531  
50  
51  
52  
53  
54  
55  
56  
57  
58  
59  
60

**Table 1. Professionals Fields from the Bureau of Labor Statistics and Occupations of Non-Medical Interviewees**

| <b>Professional field/Occupation groups</b>                   | <b>Occupations</b>                     |
|---------------------------------------------------------------|----------------------------------------|
| Management                                                    | Hospice program director               |
|                                                               | Restaurateur                           |
|                                                               | Middle school principal                |
|                                                               | CEO of a technology company            |
|                                                               | Software company director              |
| Business & Financial/ Sales                                   | Television sales and marketing         |
|                                                               | Startup sales                          |
|                                                               | Specialty beverage importer            |
|                                                               | Realtor                                |
| Community & Social Service                                    | Chaplain                               |
|                                                               | Licensed clinical social worker (LCSW) |
|                                                               | Health promoter                        |
|                                                               | Teacher                                |
| Education, Training & Library                                 | Music instructor                       |
|                                                               | High school health educator            |
|                                                               | Psychology Professor                   |
|                                                               | Special education educator             |
| Arts & Design/ Entertainment & Sports/ Media & Communications | Documentary filmmaker                  |

|                            |                            |
|----------------------------|----------------------------|
|                            | Design researcher          |
|                            | Professional musician      |
|                            | Creative designer          |
|                            | Journalist                 |
| Legal / Protective Service | Firefighter/EMT (Chief)    |
|                            | Restorative justice lawyer |
|                            | Police officer             |
|                            | EPA enforcement agent      |
| Personal Care and Service  | Yoga instructor            |
|                            | Hospice volunteer          |
|                            | Recreational therapist     |
|                            | Massage therapist          |

**Table 2. Characteristics of participants (N=40)**

| <b>Characteristic</b>     | <b>n</b> | <b>Percentage of sample</b> |
|---------------------------|----------|-----------------------------|
| <b>Gender</b>             |          |                             |
| Male                      | 22       | 55%                         |
| Female                    | 18       | 45%                         |
| <b>Race/Ethnicity</b>     |          |                             |
| White/Caucasian           | 24       | 60%                         |
| Asian and southeast Asian | 9        | 23%                         |
| Latino/a                  | 3        | 8%                          |
| Middle Eastern            | 2        | 5%                          |
| Pacific Islander          | 1        | 3%                          |
| African American          | 1        | 3%                          |
| <b>Age (years)</b>        |          |                             |
| 20-29                     | 4        | 10%                         |
| 30-39                     | 13       | 33%                         |
| 40-49                     | 10       | 25%                         |
| 50-59                     | 13       | 33%                         |

Table 3. Questions for interview protocol

1. What do you enjoy most about what you do?
2. Can you tell me a bit about instances in your professional work where you need to make personal connections with individuals (e.g., patients, congregants, consumers, trainees, clients)?
3. What do you do to create these connections? Are there specific things that you say or non-verbal gestures or actions that you use?
4. Is there anything that you do to help you be more present (or fully emotionally available) in these moments?
5. Is there anything you do to build trust [with the people you work with]?
6. Is there anything you do to establish boundaries for the interaction? (e.g., time, etc.)
7. Is there anything in your environment that helps or hinders you when you are trying to create these connections?
8. I am curious about how you know that you've made a connection with someone. Can you think of a specific recent interaction and walk me through how you knew you made a connection?
9. Have you had times when it was difficult to connect? What did you do?
10. Do you change your strategies for different types of people? How so?
11. Do you change your strategies in different situations (e.g., in a crisis)?
12. Are there any resources that you have found useful in developing techniques to connect and be available and present with others? Are there any experts in your profession who you'd recommend we read about or contact?
13. Is there anything else that we should know about how you create these connections?
14. What does the term presence mean to you? What does connection mean to you? Listening, rapport, trust---Can you reflect on what these words mean to you?

**Table 4. Comparative exemplar quotes from a national convenience sample of physicians and non-medical professionals about themes related to presence (n=40, interviews conducted in 2017-18)**

| Theme                                  | Physicians                                                                                                                                                                                                                                                                                      | Non-Medical Professionals                                                                                                                                                                                                                      |
|----------------------------------------|-------------------------------------------------------------------------------------------------------------------------------------------------------------------------------------------------------------------------------------------------------------------------------------------------|------------------------------------------------------------------------------------------------------------------------------------------------------------------------------------------------------------------------------------------------|
| <i>Purposeful Intention to Connect</i> |                                                                                                                                                                                                                                                                                                 |                                                                                                                                                                                                                                                |
| Intention to connect                   | You want to open [communication]... You want to have people feel freedom that they can talk to you about personal things. [MD1]                                                                                                                                                                 | I think that's the goal of presence... to obtain a connection, but you may or may not get it. [EPA enforcement agent]                                                                                                                          |
| Attention                              | I think just really being there, and being already listening to them, ...So, I don't look at the computer. I just really try to look at them. [MD1]                                                                                                                                             | I like "attending" better than "presence" because it suggests that there's a relationship. [LCSW]                                                                                                                                              |
| Focus                                  | I guess it's just a complete focus on the patient at that time and at that moment, and really trying to give your undivided attention to that. [MD3]                                                                                                                                            | Staying focused on the moment, looking somebody in the eye. [Journalist]                                                                                                                                                                       |
| Listening                              | I think I've learned to just sit and listen and be present for when patients share their story about what's going on with them, and what's of interest to them, and really just giving them the space to talk about that and overcoming the urge to interrupt or direct the conversation. [MD8] | Listening and responding to them. ...one of the most difficult parts of interviewing somebody is truly listening... So, being present is truly listening. [Journalist]                                                                         |
| Focusing on the client/patient story   | The interview often with me is... that really intense connected moment where I'm really trying to understand their level of suffering, what this means to them, the significance of their story and how that impacts their life. [MD2]                                                          | Most of the times it's about hearing someone's story and about why they did something, and where it led them, and who they are now. And so those experiences change me often ...because I was present for [the story]. [Documentary filmmaker] |



1  
2  
3  
4  
5  
6  
7  
8  
9  
10  
11  
12  
13  
14  
15  
16  
17  
18  
19  
20  
21  
22  
23  
24  
25  
26  
27  
28  
29  
30  
31  
32  
33  
34  
35  
36  
37  
38  
39  
40  
41  
42  
43  
44  
45  
46  
47  
48  
49  
50  
51  
52  
53  
54  
55  
56  
57  
58  
59  
60

|                 |                                                                                                                                                                                |                                                                                                         |
|-----------------|--------------------------------------------------------------------------------------------------------------------------------------------------------------------------------|---------------------------------------------------------------------------------------------------------|
| Not being alone | ...so [a patient] didn't feel like she was completely alone in that, I assessed that the best way to make her feel safe was for me to disclose my vulnerability as well. [MD2] | We haven't been alone to each other, we haven't been alone to what's greater than ourselves. [Chaplain] |
|-----------------|--------------------------------------------------------------------------------------------------------------------------------------------------------------------------------|---------------------------------------------------------------------------------------------------------|

|                       |                                                                                                                                            |                                                                                                                                                                                                  |
|-----------------------|--------------------------------------------------------------------------------------------------------------------------------------------|--------------------------------------------------------------------------------------------------------------------------------------------------------------------------------------------------|
| Removing distractions | Well, so I kind of say that your baggage is packed. So, it isn't spilling into the office visit or the phone call or whatever it is. [MD7] | It means kind of the opposite of distraction. It's kind of focus on your conversation and interaction with a person in real time and having a true sense of focus on it. [EPA enforcement agent] |
|-----------------------|--------------------------------------------------------------------------------------------------------------------------------------------|--------------------------------------------------------------------------------------------------------------------------------------------------------------------------------------------------|

---

### *Conscious Navigation of Time*

---

|                          |                                                                                                                                                                |                                                                                                                                                                                                                        |
|--------------------------|----------------------------------------------------------------------------------------------------------------------------------------------------------------|------------------------------------------------------------------------------------------------------------------------------------------------------------------------------------------------------------------------|
| Returning to the present | It is almost like a meditation where we're taught to focus on our breathing and focus, but naturally our mind wanders, and you want to check that email. [MD3] | ... the executive director of our organization..., he always uses this mantra where he says, "Now. Here. This," to stay present. And so, when I remember to do that, it has been helpful. [Restorative justice lawyer] |
|--------------------------|----------------------------------------------------------------------------------------------------------------------------------------------------------------|------------------------------------------------------------------------------------------------------------------------------------------------------------------------------------------------------------------------|

|               |                                                                                                                                                                                                       |                                                                                                                                                                                                                                   |
|---------------|-------------------------------------------------------------------------------------------------------------------------------------------------------------------------------------------------------|-----------------------------------------------------------------------------------------------------------------------------------------------------------------------------------------------------------------------------------|
| Taking breaks | I take breaks, actually. I think that's been a big thing. I am no longer interested and I'm no longer capable, because of that, of this way of working where you're constantly doing something. [MD5] | Yeah, get a good sleep, making sure that [I've] eaten, making sure there's breaks, and that I have stuff with me to keep my energy going, like [chocolate] and water and stuff, whatever I need that day. [Documentary filmmaker] |
|---------------|-------------------------------------------------------------------------------------------------------------------------------------------------------------------------------------------------------|-----------------------------------------------------------------------------------------------------------------------------------------------------------------------------------------------------------------------------------|

|                              |                                                                                                                                                                                                                                                            |                                                                                                                                                                          |
|------------------------------|------------------------------------------------------------------------------------------------------------------------------------------------------------------------------------------------------------------------------------------------------------|--------------------------------------------------------------------------------------------------------------------------------------------------------------------------|
| Quiet/silence / slowing down | I'm not in as much of a rush to get to the right answer. I'm more comfortable with the silence, with the space, with the level of certainty that comes with primary care, and understanding that I don't have to have the answer right this instant. [MD8] | I think silence is a big part of presence, and I think just taking a minute to notice, to get where the person is from, really how are you today. [Psychology professor] |
|------------------------------|------------------------------------------------------------------------------------------------------------------------------------------------------------------------------------------------------------------------------------------------------------|--------------------------------------------------------------------------------------------------------------------------------------------------------------------------|

---

### *Management of the Physical Environment*

---

|                                              |                                                                                                                                                                                                     |                                                                                                                                                                                         |
|----------------------------------------------|-----------------------------------------------------------------------------------------------------------------------------------------------------------------------------------------------------|-----------------------------------------------------------------------------------------------------------------------------------------------------------------------------------------|
| Occupying the same space as a client/patient | I certainly pull the chair up close to talk to people trying to find that right distance, not too close, but certainly not across the room. Just trying to be in that space with the patient. [MD1] | Presence is a felt sense that I have of ... being seated inside myself in my body and being present in the room, sitting in the room and aware of everything that's in the room. [LCSW] |
|----------------------------------------------|-----------------------------------------------------------------------------------------------------------------------------------------------------------------------------------------------------|-----------------------------------------------------------------------------------------------------------------------------------------------------------------------------------------|

Setting  
boundaries

I'll be very persistent [about staying on topic]. Like, 'Uh, no, we're not going there. We're staying here.' That's ...related to boundary setting ...trying to control things so that there can be connection, so that something can happen, so that there's time to actually engage...[MD5]

...Setting boundaries... [is] I hear you say ... 'here's what I'm going to do and here's what you're going to do. Is that okay with you?' Asking permission. [Recreational therapist]

Technology/  
managing  
competing  
priorities

And so, maybe part of presence is also letting them know, okay, I'm looking at the ER visit, because you're telling me about that. [MD3]

So, you close the laptop and you get away from the table and you don't look at your notes and you connect. [Psychology professor]

# Reporting checklist for qualitative study.

Based on the SRQR guidelines.

## Instructions to authors

Complete this checklist by entering the page numbers from your manuscript where readers will find each of the items listed below.

Your article may not currently address all the items on the checklist. Please modify your text to include the missing information. If you are certain that an item does not apply, please write "n/a" and provide a short explanation.

Upload your completed checklist as an extra file when you submit to a journal.

In your methods section, say that you used the SRQR reporting guidelines, and cite them as:

O'Brien BC, Harris IB, Beckman TJ, Reed DA, Cook DA. Standards for reporting qualitative research: a synthesis of recommendations. *Acad Med.* 2014;89(9):1245-1251.

|                                            | Reporting Item                                                                                                                                                                                                                                 | Page Number |
|--------------------------------------------|------------------------------------------------------------------------------------------------------------------------------------------------------------------------------------------------------------------------------------------------|-------------|
|                                            | #1 Concise description of the nature and topic of the study identifying the study as qualitative or indicating the approach (e.g. ethnography, grounded theory) or data collection methods (e.g. interview, focus group) is recommended        | 1           |
|                                            | #2 Summary of the key elements of the study using the abstract format of the intended publication; typically includes background, purpose, methods, results and conclusions                                                                    | 4-5         |
| Problem formulation                        | #3 Description and significance of the problem / phenomenon studied: review of relevant theory and empirical work; problem statement                                                                                                           | 6           |
| Purpose or research question               | #4 Purpose of the study and specific objectives or questions                                                                                                                                                                                   | 6           |
| Qualitative approach and research paradigm | #5 Qualitative approach (e.g. ethnography, grounded theory, case study, phenomenology, narrative research) and guiding theory if appropriate; identifying the research paradigm (e.g. postpositivist, constructivist / interpretivist) is also | 6-7         |

recommended; rationale. The rationale should briefly discuss the justification for choosing that theory, approach, method or technique rather than other options available; the assumptions and limitations implicit in those choices and how those choices influence study conclusions and transferability. As appropriate the rationale for several items might be discussed together.

|    |                            |     |                                                                    |   |
|----|----------------------------|-----|--------------------------------------------------------------------|---|
| 1  |                            |     |                                                                    |   |
| 2  |                            |     |                                                                    |   |
| 3  |                            |     |                                                                    |   |
| 4  |                            |     |                                                                    |   |
| 5  |                            |     |                                                                    |   |
| 6  |                            |     |                                                                    |   |
| 7  |                            |     |                                                                    |   |
| 8  |                            |     |                                                                    |   |
| 9  |                            |     |                                                                    |   |
| 10 | Researcher characteristics | #6  | Researchers' characteristics that may influence the research,      | 7 |
| 11 | and reflexivity            |     | including personal attributes, qualifications / experience,        |   |
| 12 |                            |     | relationship with participants, assumptions and / or               |   |
| 13 |                            |     | presuppositions; potential or actual interaction between           |   |
| 14 |                            |     | researchers' characteristics and the research questions,           |   |
| 15 |                            |     | approach, methods, results and / or transferability                |   |
| 16 |                            |     |                                                                    |   |
| 17 |                            |     |                                                                    |   |
| 18 |                            |     |                                                                    |   |
| 19 |                            |     |                                                                    |   |
| 20 | Context                    | #7  | Setting / site and salient contextual factors; rationale           | 6 |
| 21 |                            |     |                                                                    |   |
| 22 | Sampling strategy          | #8  | How and why research participants, documents, or events were       | 6 |
| 23 |                            |     | selected; criteria for deciding when no further sampling was       |   |
| 24 |                            |     | necessary (e.g. sampling saturation); rationale                    |   |
| 25 |                            |     |                                                                    |   |
| 26 |                            |     |                                                                    |   |
| 27 | Ethical issues pertaining  | #9  | Documentation of approval by an appropriate ethics review          | 7 |
| 28 | to human subjects          |     | board and participant consent, or explanation for lack thereof;    |   |
| 29 |                            |     | other confidentiality and data security issues                     |   |
| 30 |                            |     |                                                                    |   |
| 31 |                            |     |                                                                    |   |
| 32 |                            |     |                                                                    |   |
| 33 | Data collection methods    | #10 | Types of data collected; details of data collection procedures     | 7 |
| 34 |                            |     | including (as appropriate) start and stop dates of data collection |   |
| 35 |                            |     | and analysis, iterative process, triangulation of sources /        |   |
| 36 |                            |     | methods, and modification of procedures in response to             |   |
| 37 |                            |     | evolving study findings; rationale                                 |   |
| 38 |                            |     |                                                                    |   |
| 39 |                            |     |                                                                    |   |
| 40 |                            |     |                                                                    |   |
| 41 | Data collection            | #11 | Description of instruments (e.g. interview guides,                 | 7 |
| 42 | instruments and            |     | questionnaires) and devices (e.g. audio recorders) used for data   |   |
| 43 | technologies               |     | collection; if / how the instruments(s) changed over the course    |   |
| 44 |                            |     | of the study                                                       |   |
| 45 |                            |     |                                                                    |   |
| 46 |                            |     |                                                                    |   |
| 47 |                            |     |                                                                    |   |
| 48 | Units of study             | #12 | Number and relevant characteristics of participants, documents,    | 7 |
| 49 |                            |     | or events included in the study; level of participation (could be  |   |
| 50 |                            |     | reported in results)                                               |   |
| 51 |                            |     |                                                                    |   |
| 52 |                            |     |                                                                    |   |
| 53 | Data processing            | #13 | Methods for processing data prior to and during analysis,          | 7 |
| 54 |                            |     | including transcription, data entry, data management and           |   |
| 55 |                            |     | security, verification of data integrity, data coding, and         |   |
| 56 |                            |     | anonymisation / deidentification of excerpts                       |   |
| 57 |                            |     |                                                                    |   |
| 58 |                            |     |                                                                    |   |
| 59 |                            |     |                                                                    |   |
| 60 |                            |     |                                                                    |   |

|    |                                                                                              |     |                                                                                                                                                                                                                                                                                                          |            |
|----|----------------------------------------------------------------------------------------------|-----|----------------------------------------------------------------------------------------------------------------------------------------------------------------------------------------------------------------------------------------------------------------------------------------------------------|------------|
| 1  | Data analysis                                                                                | #14 | Process by which inferences, themes, etc. were identified and developed, including the researchers involved in data analysis; usually references a specific paradigm or approach; rationale                                                                                                              | 7          |
| 2  |                                                                                              |     |                                                                                                                                                                                                                                                                                                          |            |
| 3  |                                                                                              |     |                                                                                                                                                                                                                                                                                                          |            |
| 4  |                                                                                              |     |                                                                                                                                                                                                                                                                                                          |            |
| 5  |                                                                                              |     |                                                                                                                                                                                                                                                                                                          |            |
| 6  | Techniques to enhance trustworthiness                                                        | #15 | Techniques to enhance trustworthiness and credibility of data analysis (e.g. member checking, audit trail, triangulation); rationale                                                                                                                                                                     | 7          |
| 7  |                                                                                              |     |                                                                                                                                                                                                                                                                                                          |            |
| 8  |                                                                                              |     |                                                                                                                                                                                                                                                                                                          |            |
| 9  |                                                                                              |     |                                                                                                                                                                                                                                                                                                          |            |
| 10 |                                                                                              |     |                                                                                                                                                                                                                                                                                                          |            |
| 11 | Syntheses and interpretation                                                                 | #16 | Main findings (e.g. interpretations, inferences, and themes); might include development of a theory or model, or integration with prior research or theory                                                                                                                                               | 8-9        |
| 12 |                                                                                              |     |                                                                                                                                                                                                                                                                                                          |            |
| 13 |                                                                                              |     |                                                                                                                                                                                                                                                                                                          |            |
| 14 |                                                                                              |     |                                                                                                                                                                                                                                                                                                          |            |
| 15 |                                                                                              |     |                                                                                                                                                                                                                                                                                                          |            |
| 16 |                                                                                              |     |                                                                                                                                                                                                                                                                                                          |            |
| 17 | Links to empirical data                                                                      | #17 | Evidence (e.g. quotes, field notes, text excerpts, photographs) to substantiate analytic findings                                                                                                                                                                                                        | See note 1 |
| 18 |                                                                                              |     |                                                                                                                                                                                                                                                                                                          |            |
| 19 |                                                                                              |     |                                                                                                                                                                                                                                                                                                          |            |
| 20 |                                                                                              |     |                                                                                                                                                                                                                                                                                                          |            |
| 21 | Intergration with prior work, implications, transferability and contribution(s) to the field | #18 | Short summary of main findings; explanation of how findings and conclusions connect to, support, elaborate on, or challenge conclusions of earlier scholarship; discussion of scope of application / generalizability; identification of unique contributions(s) to scholarship in a discipline or field | 10         |
| 22 |                                                                                              |     |                                                                                                                                                                                                                                                                                                          |            |
| 23 |                                                                                              |     |                                                                                                                                                                                                                                                                                                          |            |
| 24 |                                                                                              |     |                                                                                                                                                                                                                                                                                                          |            |
| 25 |                                                                                              |     |                                                                                                                                                                                                                                                                                                          |            |
| 26 |                                                                                              |     |                                                                                                                                                                                                                                                                                                          |            |
| 27 |                                                                                              |     |                                                                                                                                                                                                                                                                                                          |            |
| 28 |                                                                                              |     |                                                                                                                                                                                                                                                                                                          |            |
| 29 | Limitations                                                                                  | #19 | Trustworthiness and limitations of findings                                                                                                                                                                                                                                                              | 11         |
| 30 |                                                                                              |     |                                                                                                                                                                                                                                                                                                          |            |
| 31 | Conflicts of interest                                                                        | #20 | Potential sources of influence of perceived influence on study conduct and conclusions; how these were managed                                                                                                                                                                                           | 12         |
| 32 |                                                                                              |     |                                                                                                                                                                                                                                                                                                          |            |
| 33 |                                                                                              |     |                                                                                                                                                                                                                                                                                                          |            |
| 34 |                                                                                              |     |                                                                                                                                                                                                                                                                                                          |            |
| 35 | Funding                                                                                      | #21 | Sources of funding and other support; role of funders in data collection, interpretation and reporting                                                                                                                                                                                                   | 12         |
| 36 |                                                                                              |     |                                                                                                                                                                                                                                                                                                          |            |
| 37 |                                                                                              |     |                                                                                                                                                                                                                                                                                                          |            |
| 38 |                                                                                              |     |                                                                                                                                                                                                                                                                                                          |            |
| 39 |                                                                                              |     |                                                                                                                                                                                                                                                                                                          |            |

## Author notes

### 1. 8-9, Table 3

The SRQR checklist is distributed with permission of Wolters Kluwer © 2014 by the Association of American Medical Colleges. This checklist was completed on 02. April 2019 using <https://www.goodreports.org/>, a tool made by the [EQUATOR Network](#) in collaboration with [Penelope.ai](#)
